# Supplementary material for: DNA Barcoding Supports “Color-Pattern’’-Based Species of Stictochironomus from China (Diptera: Chironomidae)
Source: MDPI journal article supplement (doi:10.3390/insects15030179), 2024-03-06

ASAP Web results

date:2023-02-14T10:21:42  
input file:Stictochironomus-Alignment-3. fas.phy.reduced-5. fas  
nb of sequences:218  
length of seqs:658  
subst. model:K80 Kimura  
recurs split pval:1.000000e-02

Split probability: 0.010000 sequence length: 658

Save Spart text File [here](#)

Save Spart XML File [here](#)

10 best partitions found by ASAP (see [FAQ](#) for more details)

*The lower the score, the better the partition*

| Nb of subsets | asap-score | P-val (rank) |               | W (rank)      | Treshhold dist. | Text                     |
|---------------|------------|--------------|---------------|---------------|-----------------|--------------------------|
| 21            | 4.00       |              | 1.54e-01 (3)  | 1.59e-04 (5)  | 0.069020        | <a href="#">list csv</a> |
| * 24          | 4.50       |              | 2.16e-01 (6)  | 2.48e-03 (3)  | 0.048527        | <a href="#">list csv</a> |
| 19            | 6.00       |              | 4.29e-02 (2)  | 1.18e-04 (10) | 0.073653        | <a href="#">list csv</a> |
| 23            | 6.50       |              | 2.85e-01 (9)  | 3.82e-04 (4)  | 0.056231        | <a href="#">list csv</a> |
| * 41          | 9.50       |              | 2.71e-01 (8)  | 1.15e-04 (11) | 0.008379        | <a href="#">list csv</a> |
| 16            | 11.00      |              | 3.77e-01 (14) | 1.47e-04 (8)  | 0.088886        | <a href="#">list csv</a> |
| * 37          | 12.00      |              | 1.74e-01 (4)  | 7.54e-05 (20) | 0.009415        | <a href="#">list csv</a> |
| 12            | 17.00      |              | 1.00e-05 (1)  | 4.00e-05 (33) | 0.104006        | <a href="#">list csv</a> |
| * 44          | 17.00      |              | 3.09e-01 (11) | 7.11e-05 (23) | 0.006204        | <a href="#">list csv</a> |
| 13            | 19.00      |              | 3.63e-01 (13) | 6.97e-05 (25) | 0.101450        | <a href="#">list csv</a> |

*Number of subsets in this table equals to the number of primary species hypotheses in the respective partition*

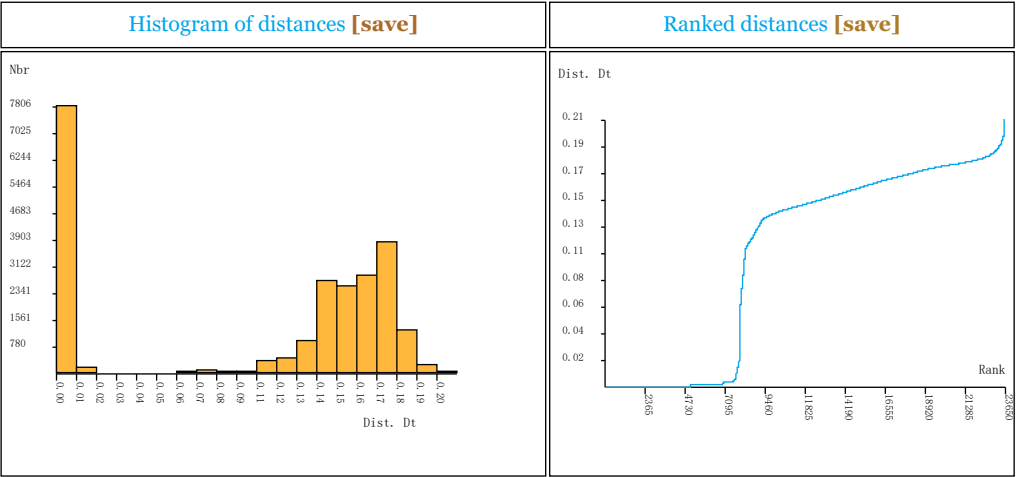

[View/Save Boxed subsets graph here](#)



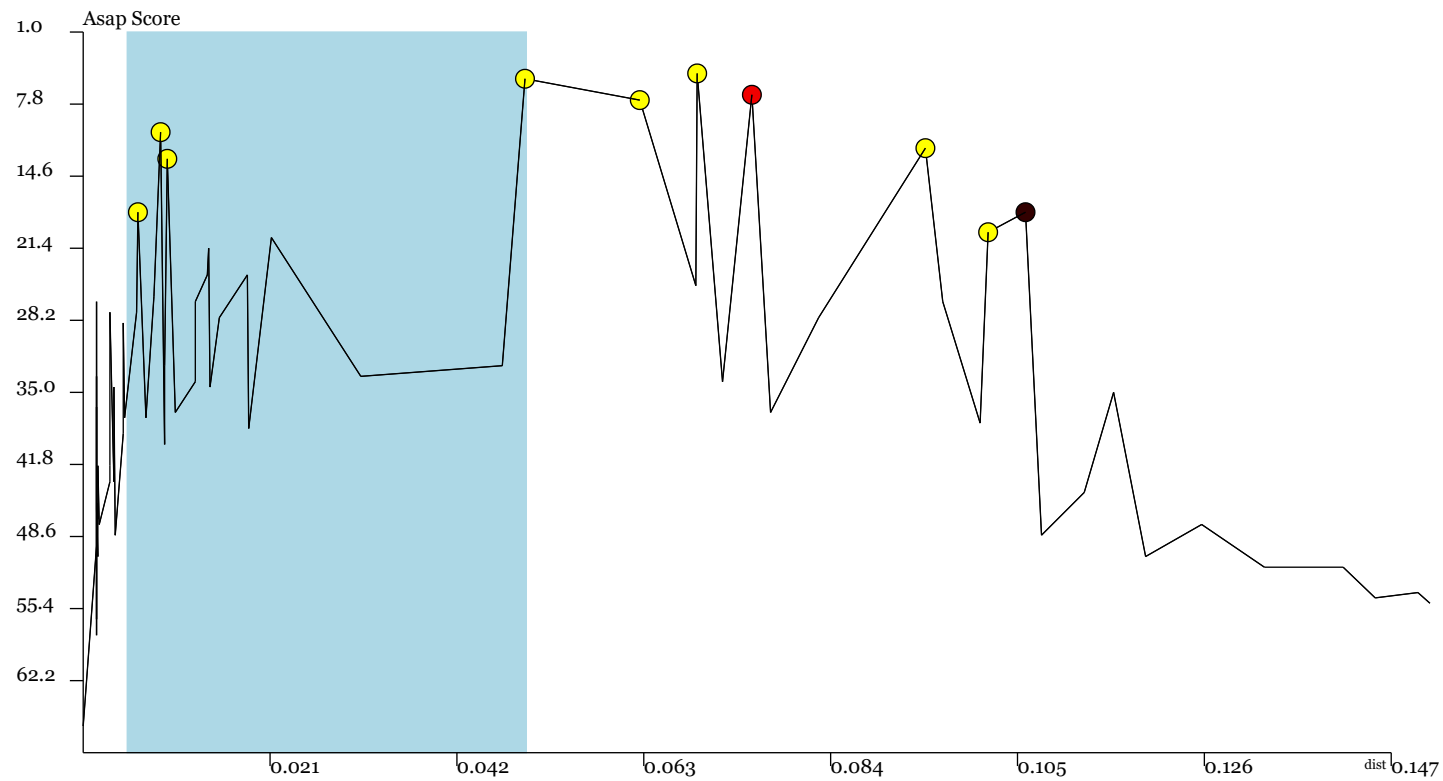

Legend: ● <0.001 ● <0.05 ● <0.1 ● >0.1 ● N/A —

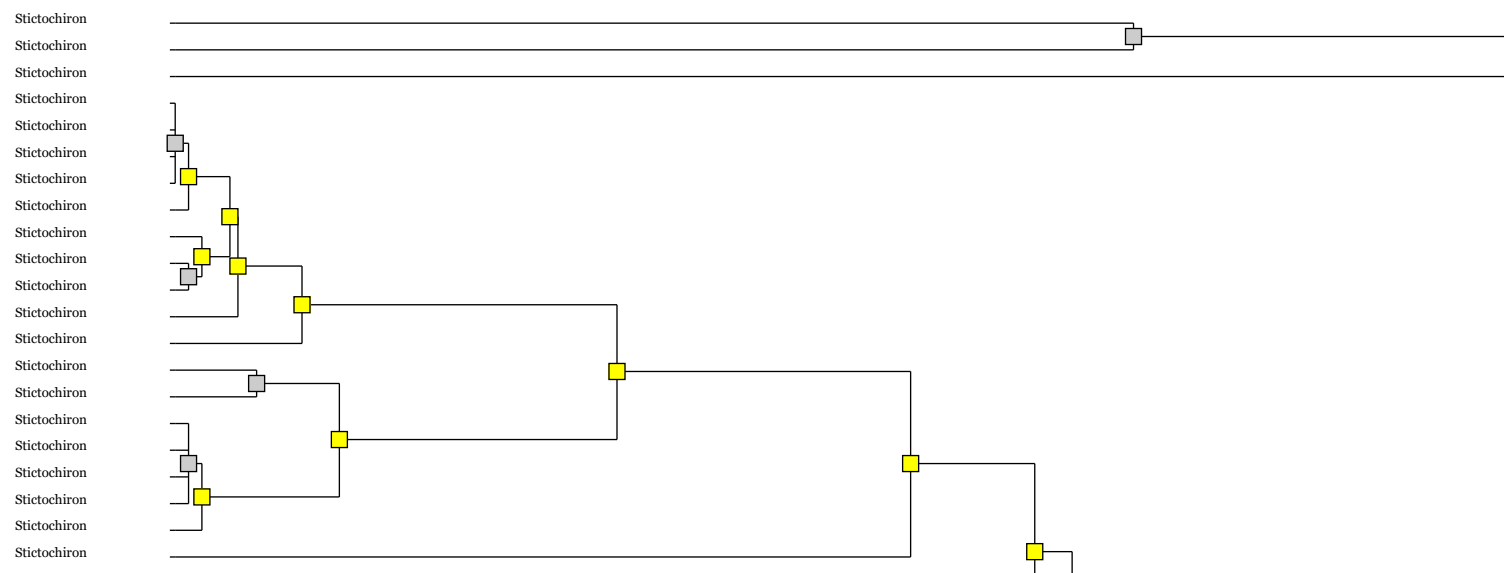

suetochiron

[View/save curves and dendrogram here](#)

Stietochiron

Stietochiron

Stietochiron

*Responsive Crossing lines Legend: Green Line= grouping distance (Dc)- Red line = treshold distance(Dt)*

Stietochiron

Running time: 0 min 8 seconds

Stietochiron

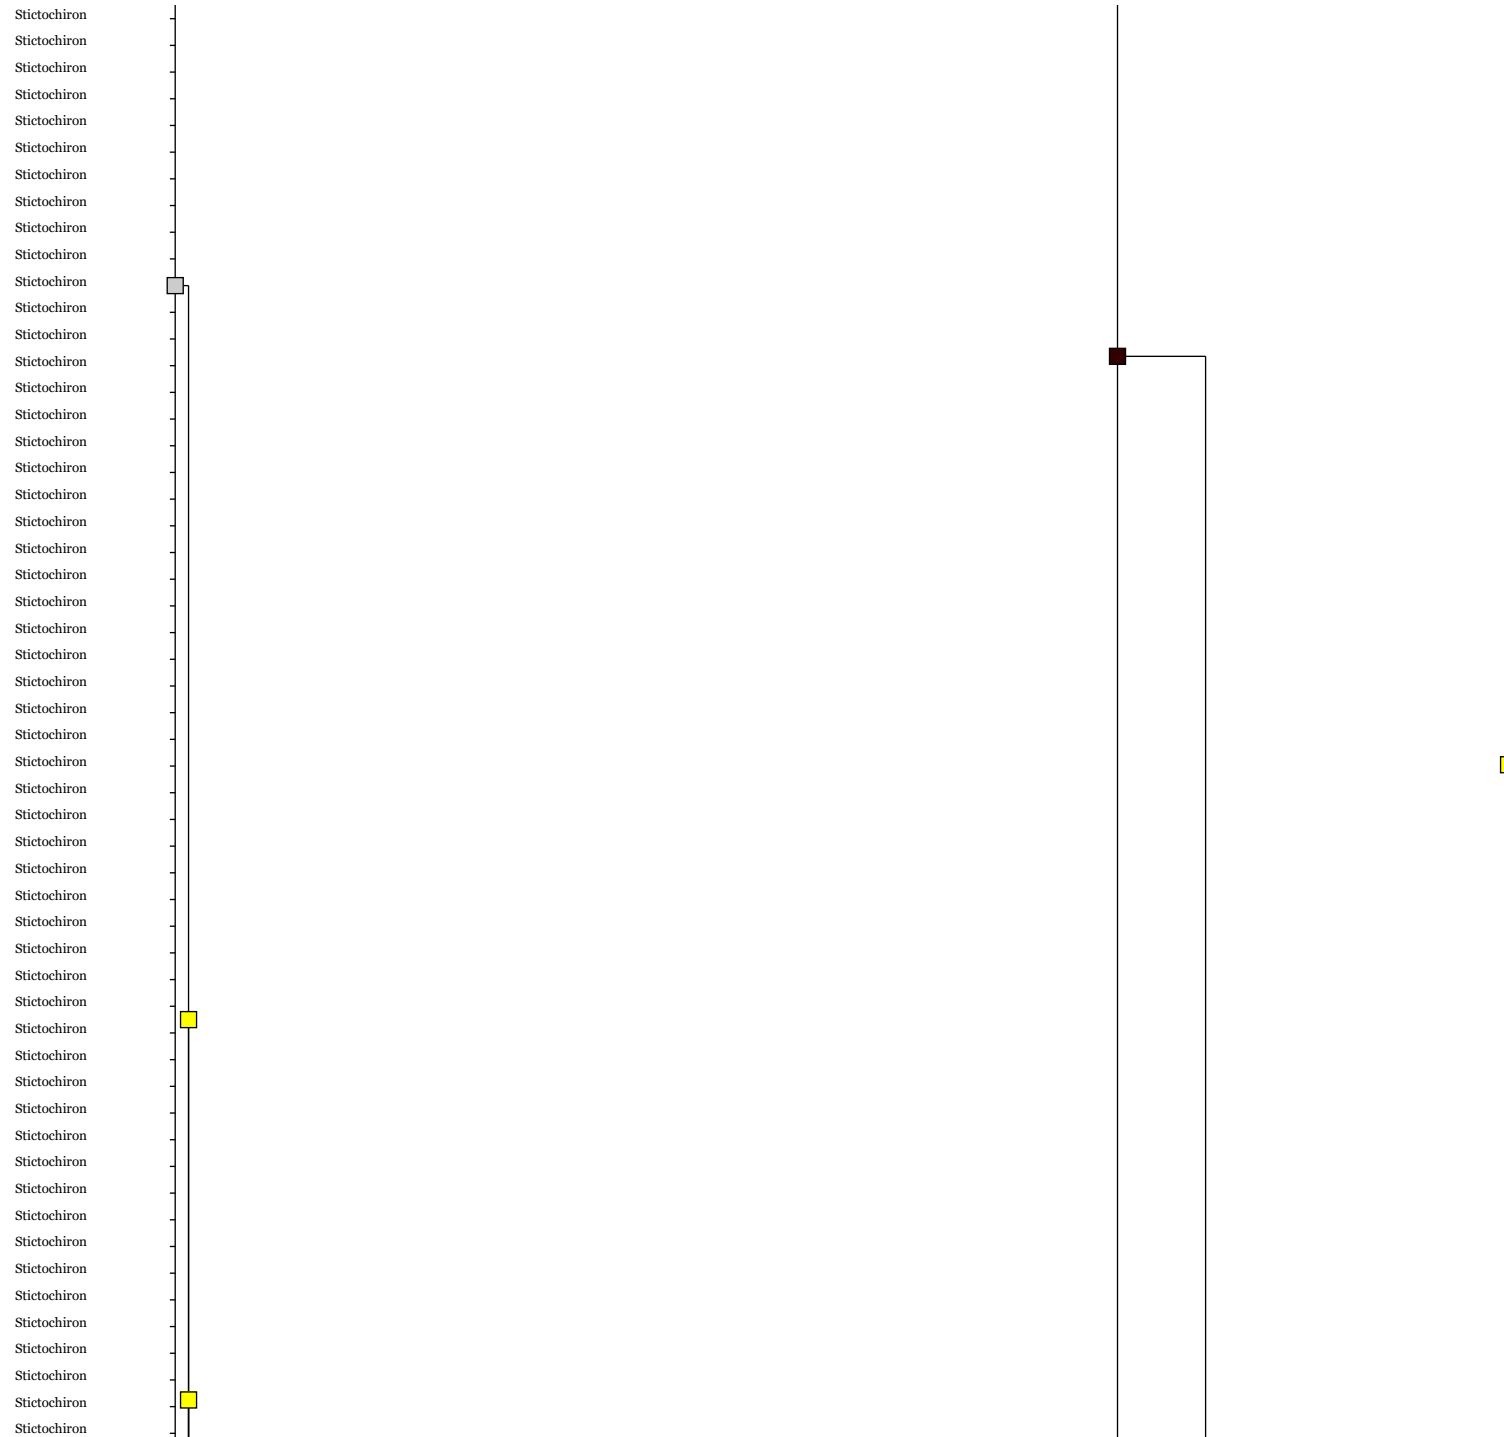

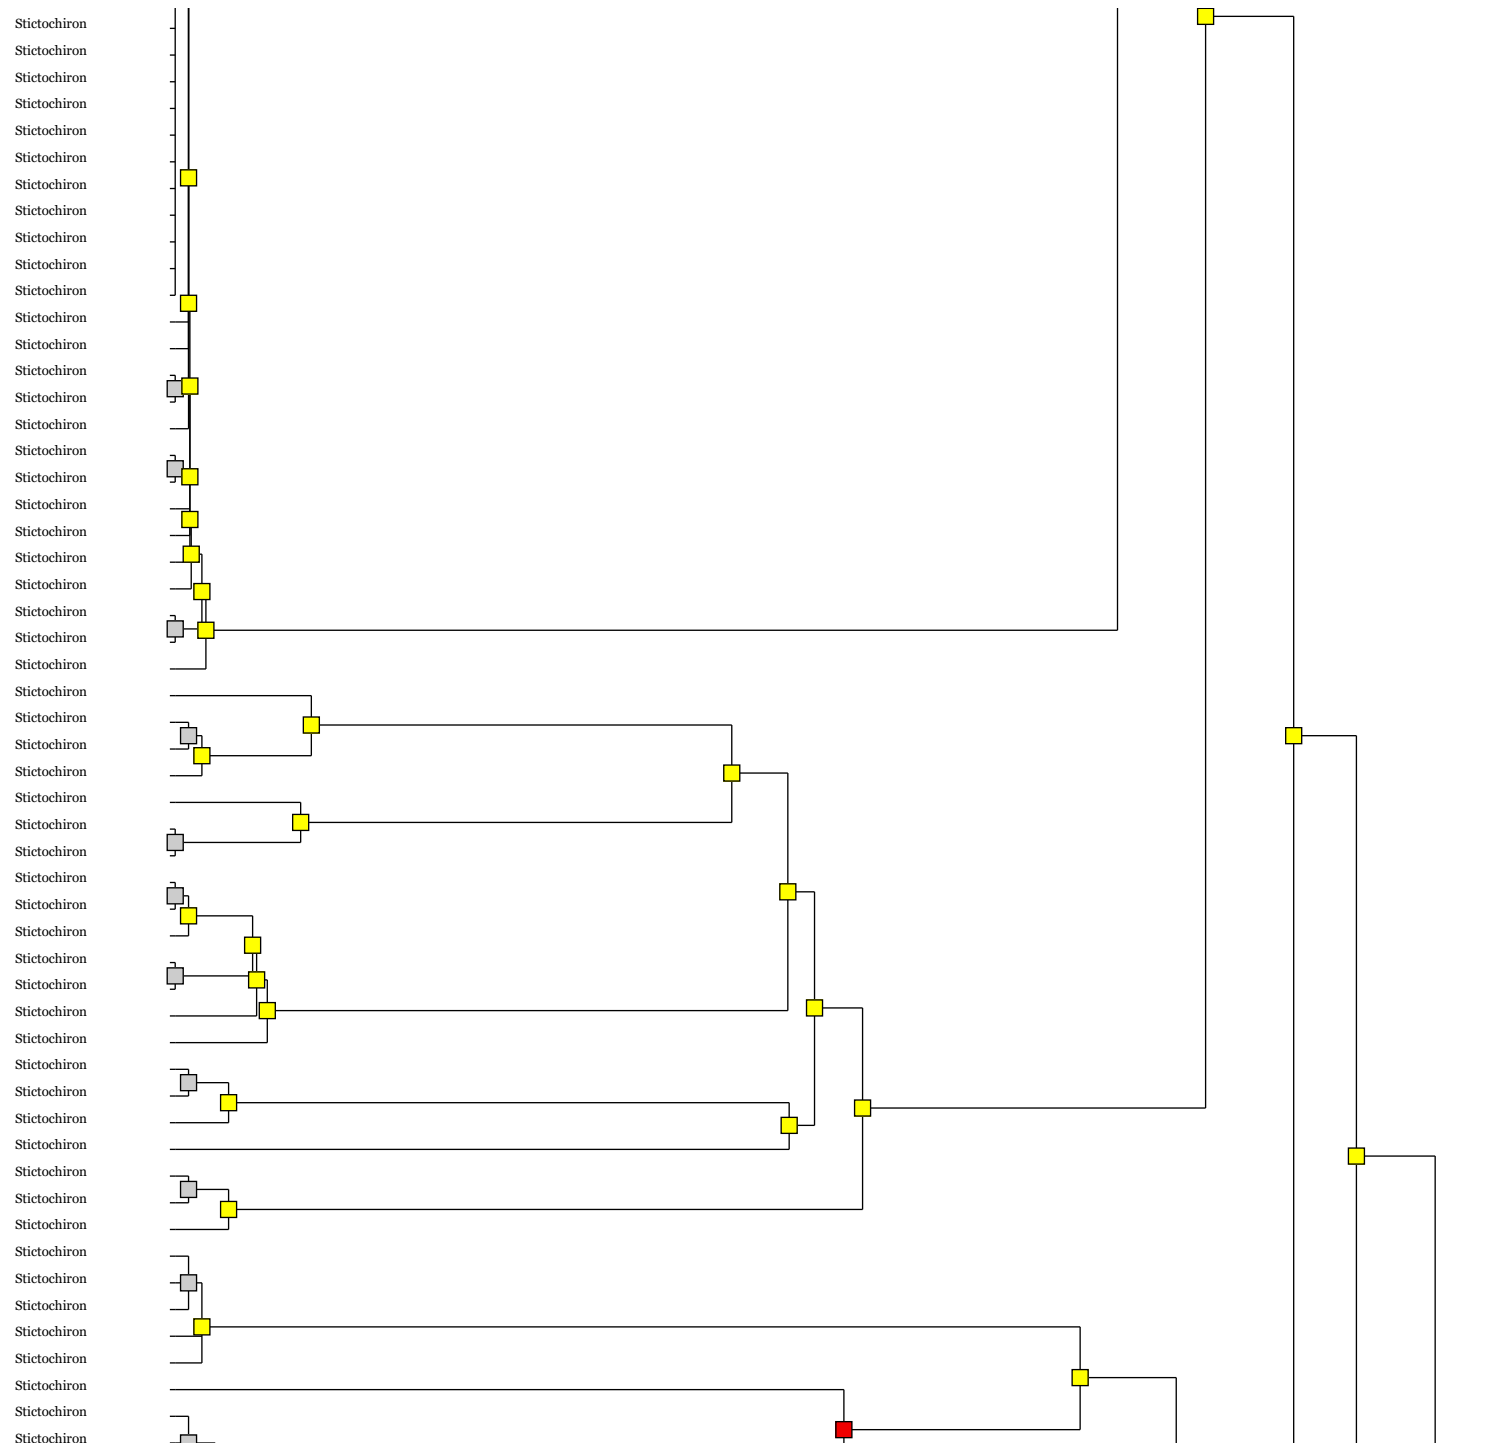

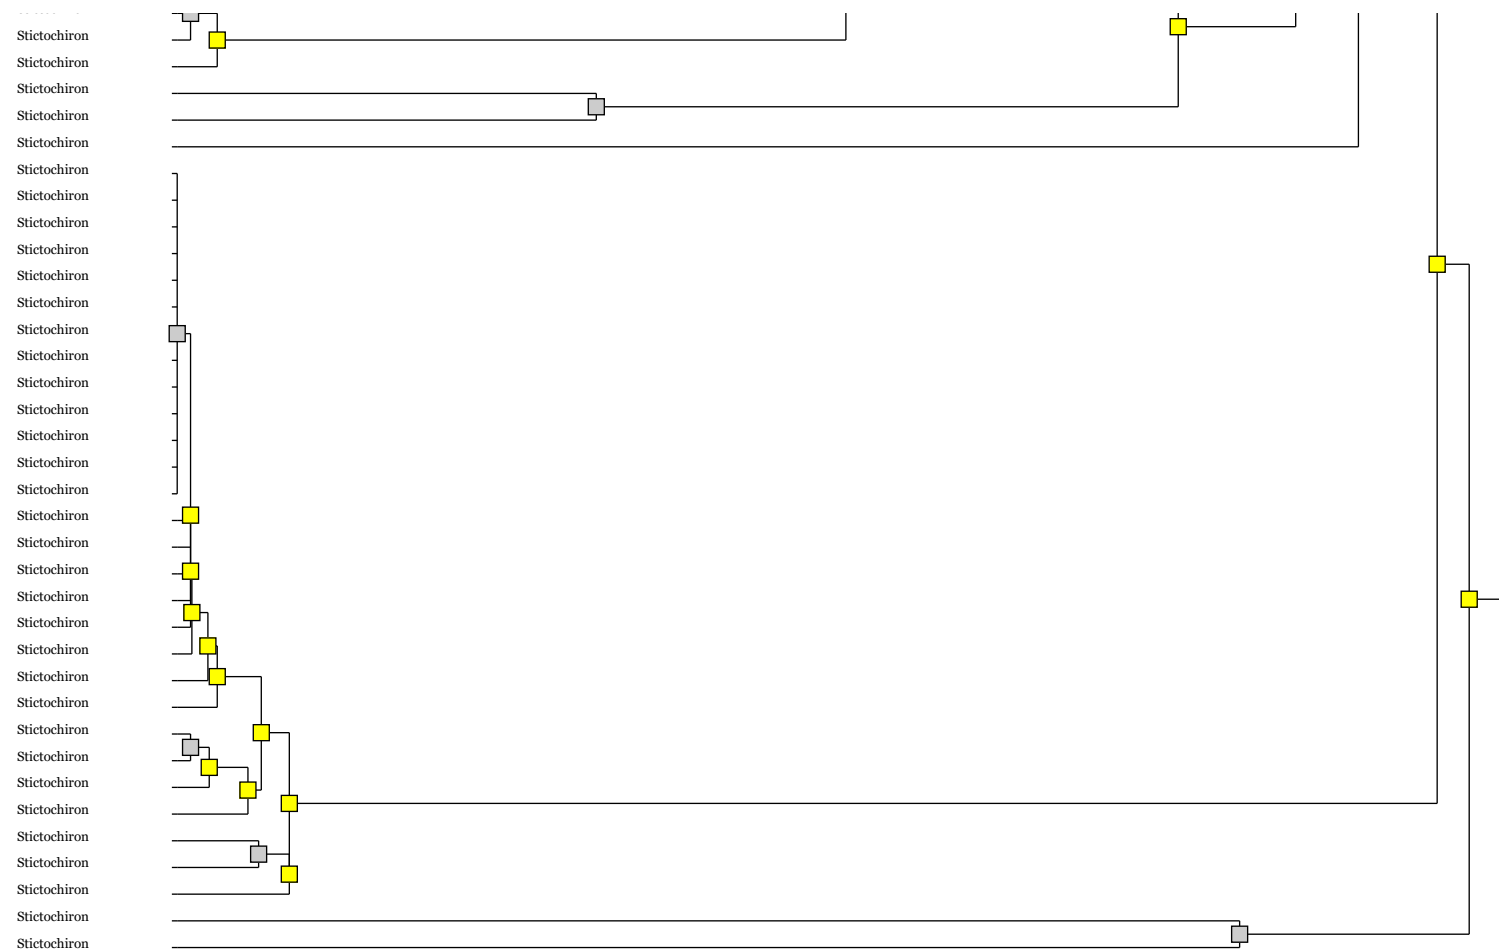

Supplement: s1 [file s1]
