# Supplementary material for: DNA Barcoding Supports “Color-Pattern’’-Based Species of Stictochironomus from China (Diptera: Chironomidae)
Source: MDPI journal article supplement (doi:10.3390/insects15030179), 2024-03-06

ASAP Web results

date:2023-02-14T10:21:42  
input file:Stictochironomus-Alignment-3.fas  
nb of sequences:704  
length of seqs:658  
subst. model:K80 Kimura  
recurs split pval:1.000000e-02

Split probability: 0.010000 sequence length: 658

Save Spart text File [here](#)

Save Spart XML File [here](#)

10 best partitions found by ASAP (see [FAQ](#) for more details)

*The lower the score, the better the partition*

| Nb of subsets | asap-score |   | P-val (rank)  | W (rank)      | Treshold dist. | Text                     |
|---------------|------------|---|---------------|---------------|----------------|--------------------------|
| * 26          | 2.50       | ● | 8.55e-03 (2)  | 9.71e-04 (3)  | 0.048527       | <a href="#">list csv</a> |
| * 27          | 3.50       | ● | 2.46e-02 (5)  | 1.87e-03 (2)  | 0.026290       | <a href="#">list csv</a> |
| 24            | 4.50       | ● | 2.01e-02 (4)  | 7.64e-05 (5)  | 0.069020       | <a href="#">list csv</a> |
| 22            | 8.50       | ● | 1.70e-02 (3)  | 6.09e-05 (14) | 0.073653       | <a href="#">list csv</a> |
| * 45          | 10.50      | ● | 4.79e-02 (9)  | 6.27e-05 (12) | 0.006204       | <a href="#">list csv</a> |
| 19            | 10.50      | ● | 6.32e-02 (11) | 6.55e-05 (10) | 0.088886       | <a href="#">list csv</a> |
| 26            | 12.00      | ● | 2.26e-01 (20) | 2.16e-04 (4)  | 0.056231       | <a href="#">list csv</a> |
| * 38          | 17.00      | ● | 2.57e-02 (6)  | 2.63e-05 (28) | 0.009415       | <a href="#">list csv</a> |
| 13            | 18.50      | ● | 1.00e-05 (1)  | 7.11e-06 (36) | 0.104006       | <a href="#">list csv</a> |
| 15            | 20.50      | ● | 4.01e-02 (8)  | 1.83e-05 (33) | 0.101450       | <a href="#">list csv</a> |

*Number of subsets in this table equals to the number of primary species hypotheses in the respective partition*

Histogram of distances [\[save\]](#)

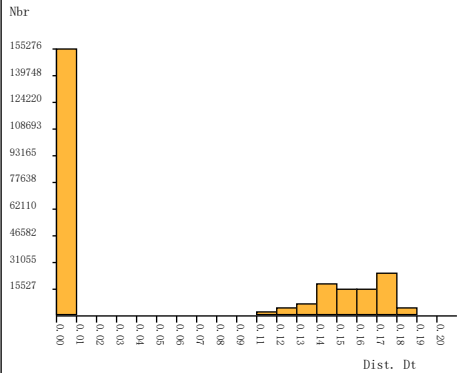

Ranked distances [\[save\]](#)

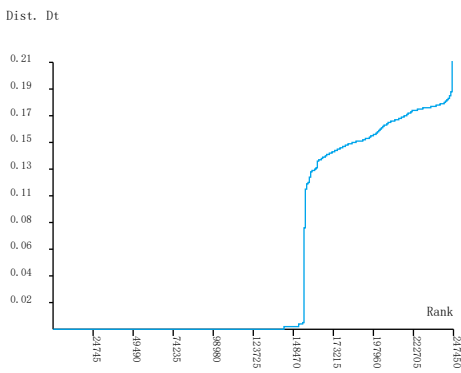

[View/Save Boxed subsets graph here](#)



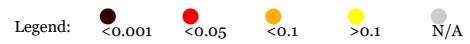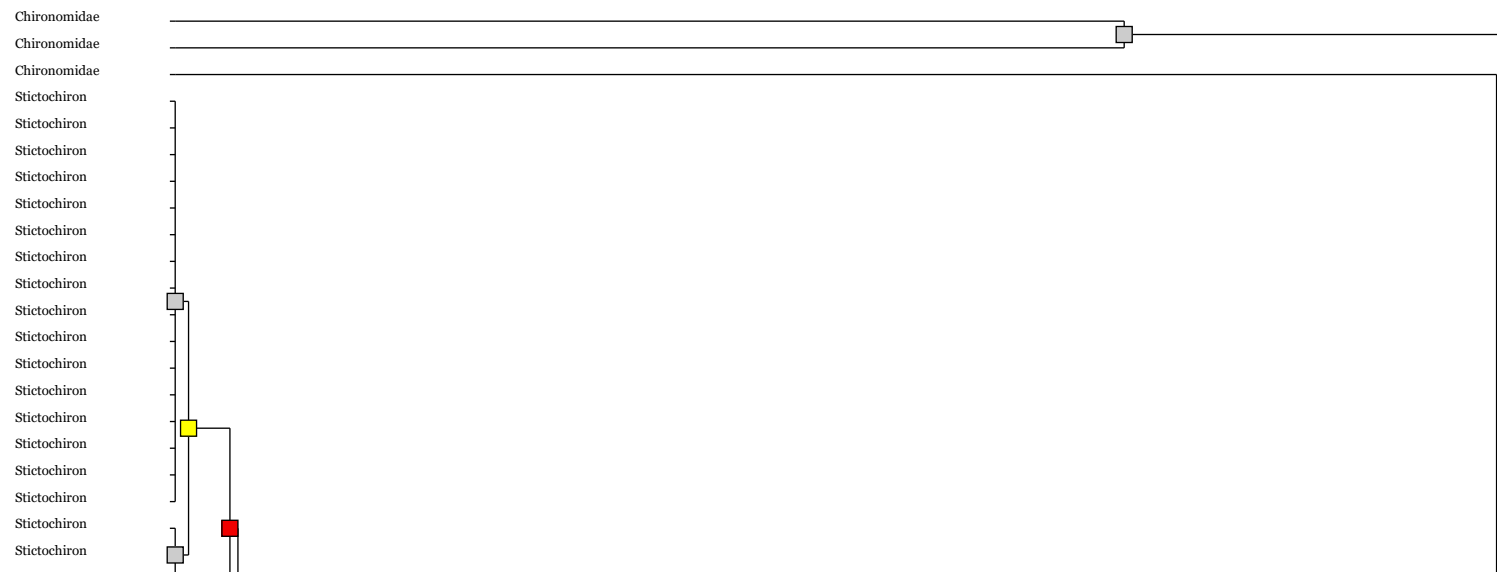

View/save curves and dendrogram [here](#)

Responsive Crossing lines Legend: Green Line= grouping distance (Dc)- Red line = threshold distance(Dt)

Running time: 0 min 30 seconds

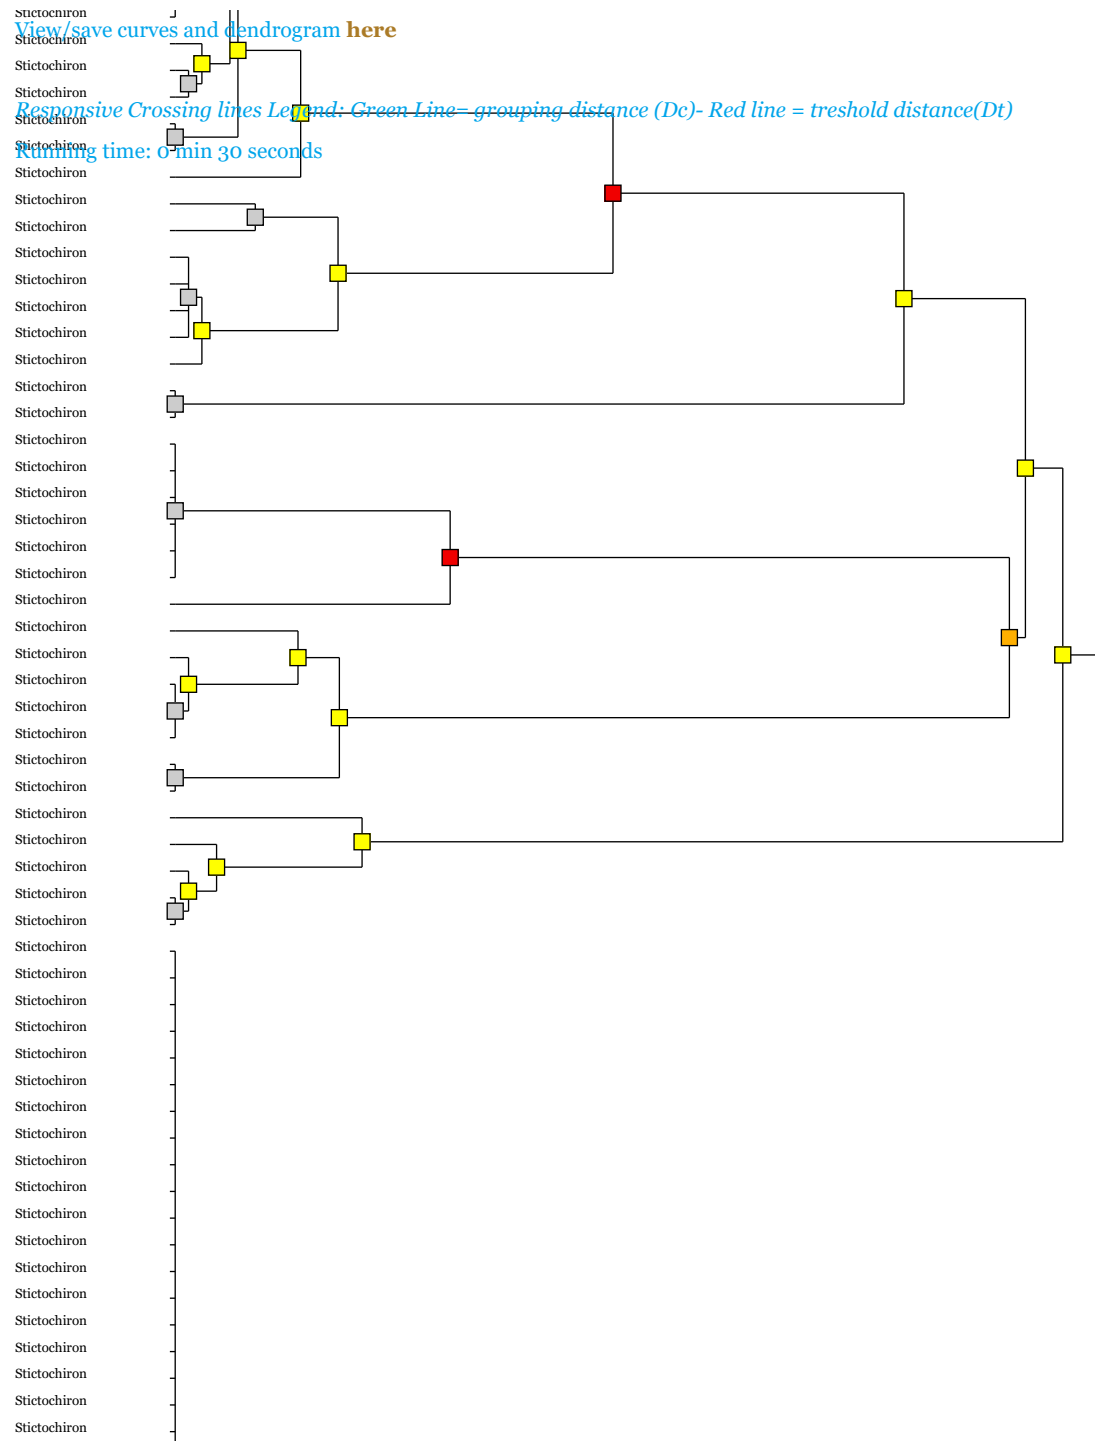





[illegible]

[illegible]



The dendrogram illustrates the hierarchical clustering of 40 *Stictochiron* samples. The tree structure is highly branched, indicating low similarity between most samples. Three specific clusters are highlighted with colored squares: a grey square at the bottom left, a dark red square in the middle right, and a yellow square at the bottom right. The x-axis represents distance, with a scale from 0 to 100.

[illegible][illegible]





[illegible]

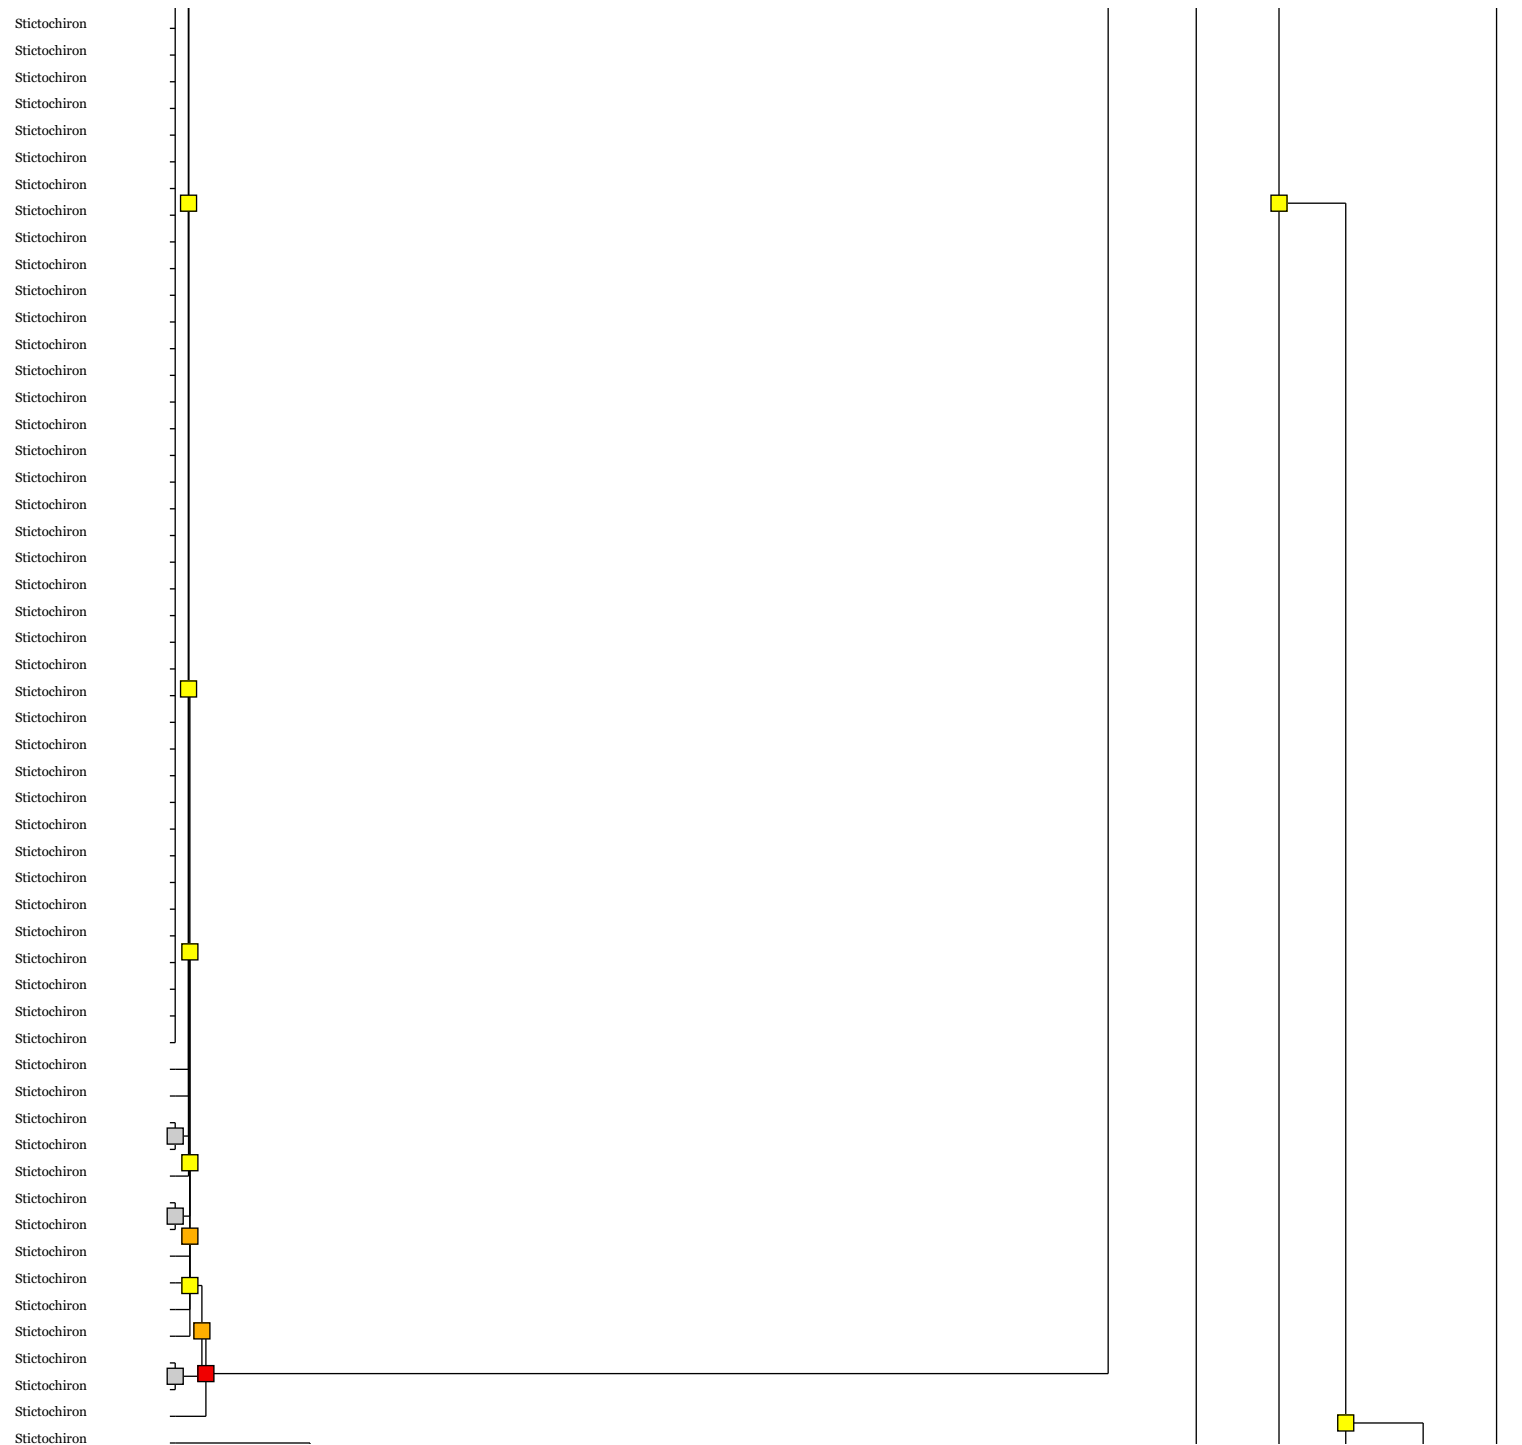

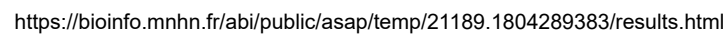

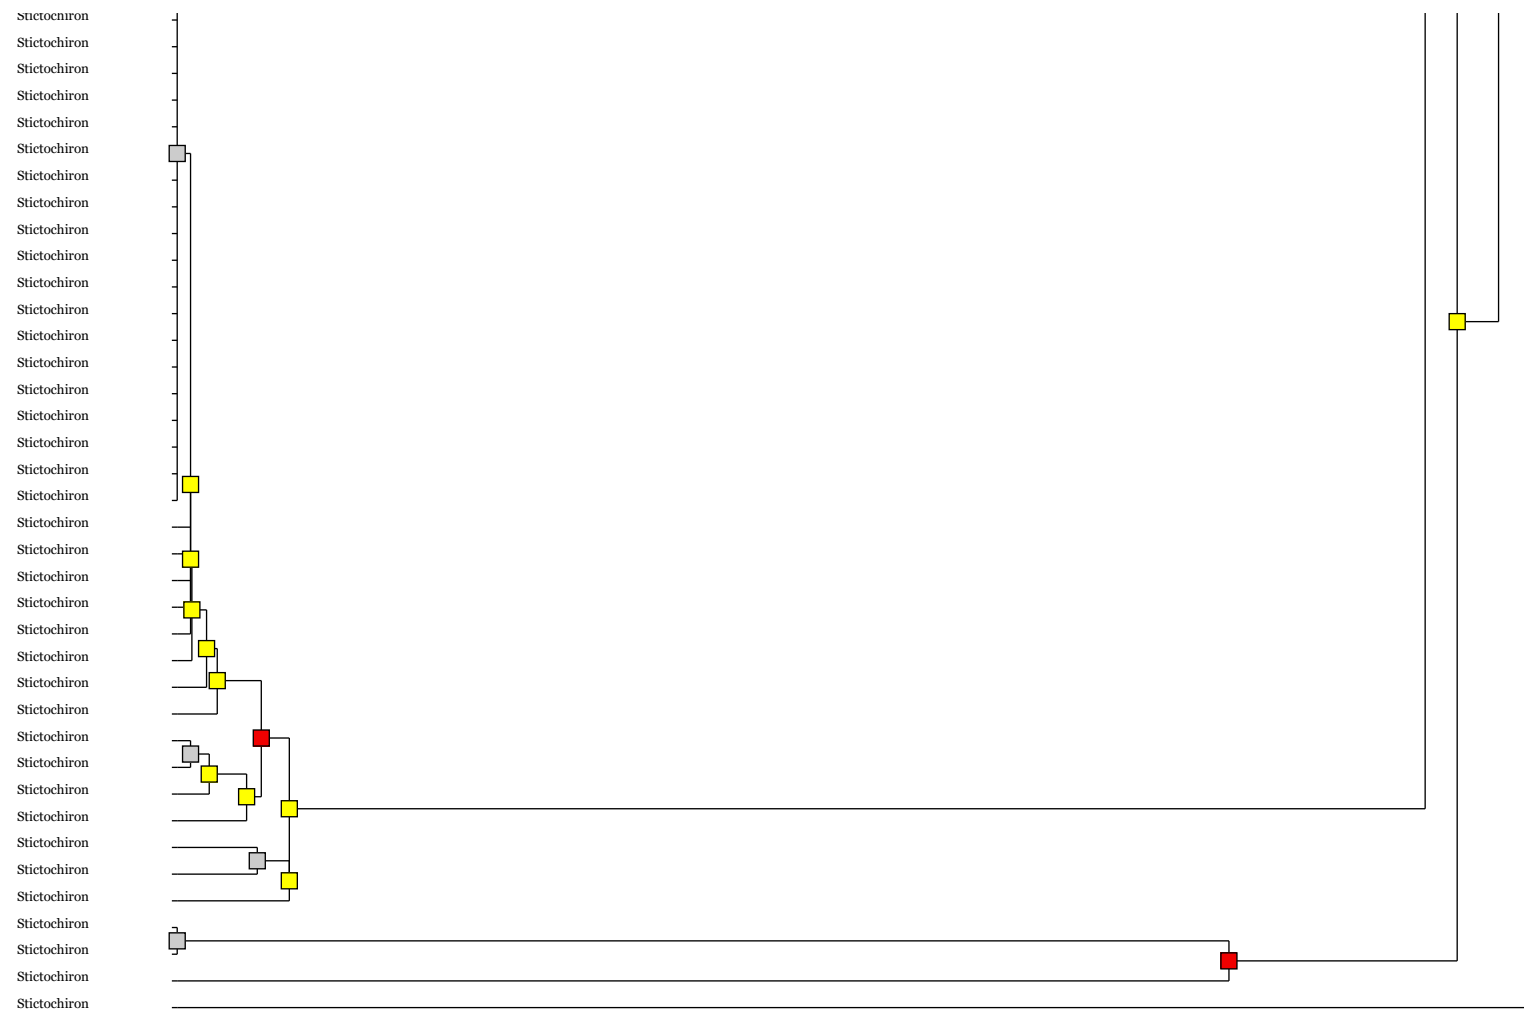

Supplement: s1 [file s1]
