# Supplementary material for: DNA Barcoding Supports “Color-Pattern’’-Based Species of Stictochironomus from China (Diptera: Chironomidae)
Source: MDPI journal article supplement (doi:10.3390/insects15030179), 2024-03-06
Supplement: s1 [file s1]

ASAP Web results

date:2023-05-22T10:11:52  
input file:hap-4l.fas  
nb of sequences:75  
length of seqs:658  
subst. model:K80 Kimura  
recurs split pval:1.000000e-02

Split probability: 0.010000 sequence length: 658

Save Spart text File [here](#)

Save Spart XML File [here](#)

10 best partitions found by ASAP (see [FAQ](#) for more details)

*The lower the score, the better the partition*

| Nb of subsets | asap-score |   | P-val (rank)  | W (rank)      | Treshhold dist. | Text                     |
|---------------|------------|---|---------------|---------------|-----------------|--------------------------|
| 20            | 3.00       | 🟡 | 5.87e-02 (1)  | 5.26e-04 (5)  | 0.076881        | <a href="#">list csv</a> |
| * 24          | 3.00       | 🟡 | 4.47e-01 (4)  | 4.50e-03 (2)  | 0.044953        | <a href="#">list csv</a> |
| 19            | 5.00       | 🟡 | 2.14e-01 (3)  | 4.98e-04 (7)  | 0.078427        | <a href="#">list csv</a> |
| 23            | 6.50       | 🟡 | 5.61e-01 (5)  | 4.61e-04 (8)  | 0.053311        | <a href="#">list csv</a> |
| 21            | 8.00       | 🟡 | 8.52e-01 (12) | 5.68e-04 (4)  | 0.068800        | <a href="#">list csv</a> |
| * 38          | 12.50      | 🟡 | 9.10e-01 (15) | 4.60e-04 (10) | 0.010322        | <a href="#">list csv</a> |
| * 36          | 12.50      | 🟡 | 9.42e-01 (16) | 4.60e-04 (9)  | 0.010339        | <a href="#">list csv</a> |
| * 32          | 13.00      | 🟡 | 7.72e-01 (10) | 3.15e-04 (16) | 0.012984        | <a href="#">list csv</a> |
| 15            | 13.50      | 🟡 | 1.30e-01 (2)  | 1.80e-04 (25) | 0.090405        | <a href="#">list csv</a> |
| * 34          | 14.00      | 🟡 | 8.52e-01 (13) | 3.15e-04 (15) | 0.012921        | <a href="#">list csv</a> |

Number of subsets in this table equals to the number of primary species hypotheses in the respective partition

Histogram of distances [\[save\]](#)

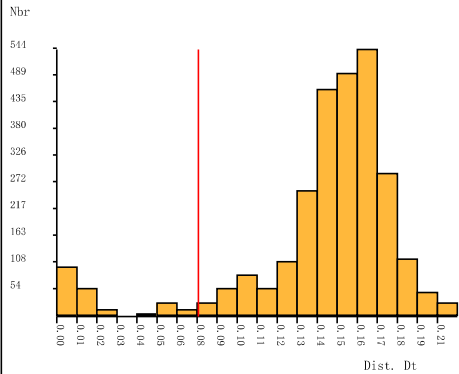

Ranked distances [\[save\]](#)

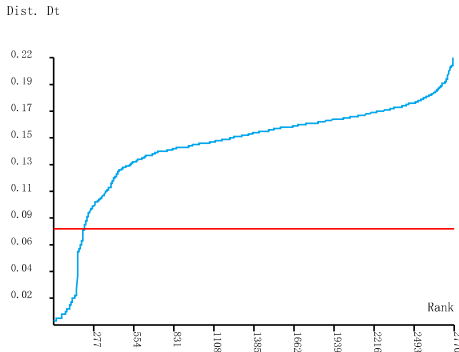

[View/Save Boxed subsets graph here](#)



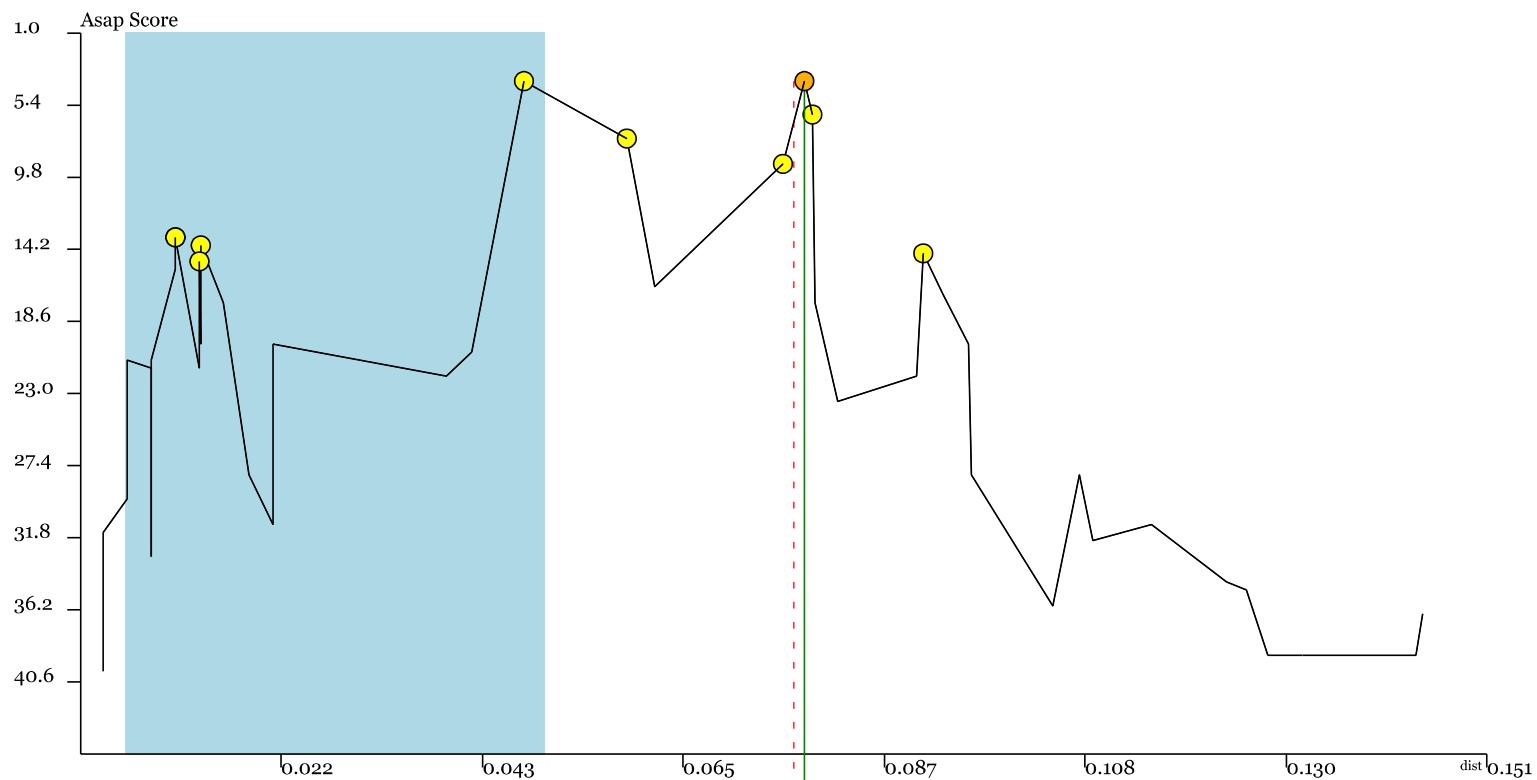

Legend: ● <0.001 ● <0.05 ● <0.1 ● >0.1 ● N/A —

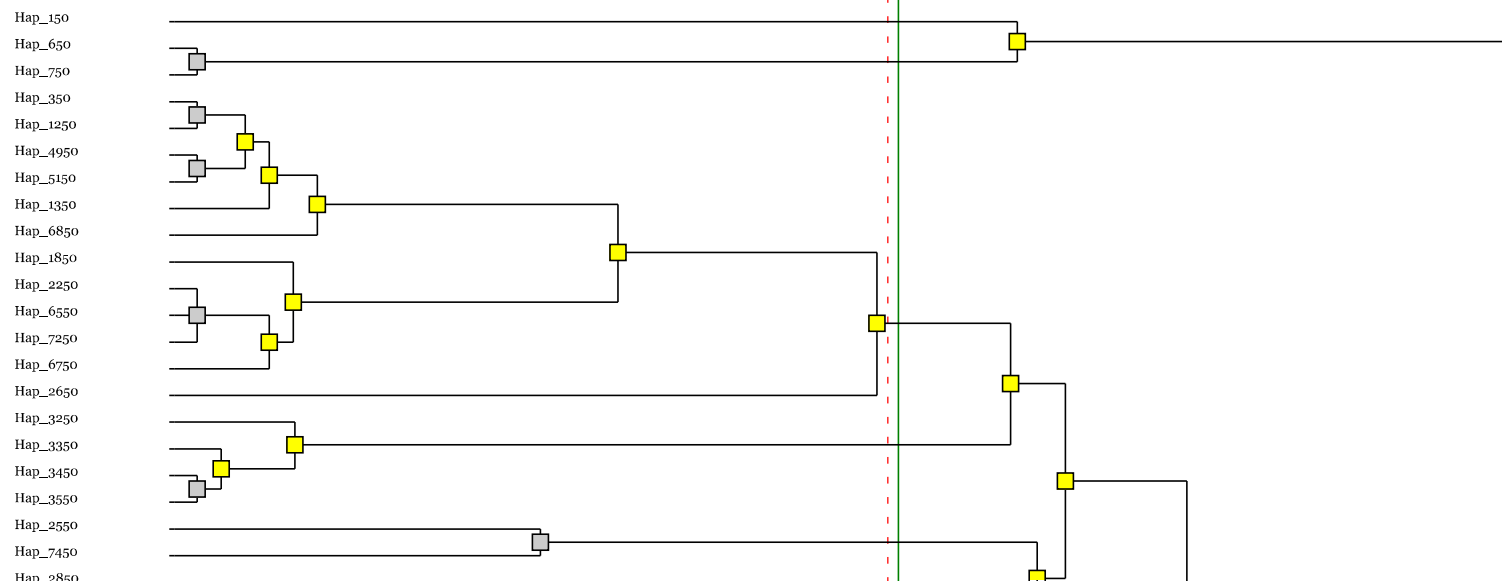

haplotype

Hap\_5250  
Hap\_3150  
Hap\_850  
Hap\_950  
Hap\_5650  
Hap\_2950  
Hap\_4050  
Hap\_4550  
Hap\_4750  
Hap\_4850  
Hap\_4650  
Hap\_1450  
Hap\_1550  
Hap\_5850  
Hap\_4150  
Hap\_4250  
Hap\_4350  
Hap\_6450  
Hap\_450  
Hap\_1050  
Hap\_2350  
Hap\_3050  
Hap\_4450  
Hap\_5050  
Hap\_6250  
Hap\_6950  
Hap\_7050  
Hap\_3850  
Hap\_5350  
Hap\_1650  
Hap\_1750  
Hap\_1950  
Hap\_5550  
Hap\_5950  
Hap\_6150  
Hap\_6050  
Hap\_2750  
Hap\_5450  
Hap\_2450  
Hap\_550  
Hap\_6650  
Hap\_7350  
Hap\_3750  
Hap\_6350  
Hap\_1150  
Hap\_2050  
Hap\_7150  
Hap\_2150  
Hap\_3950  
Hap\_3650  
Hap\_5750  
Hap\_7550  
Hap\_250

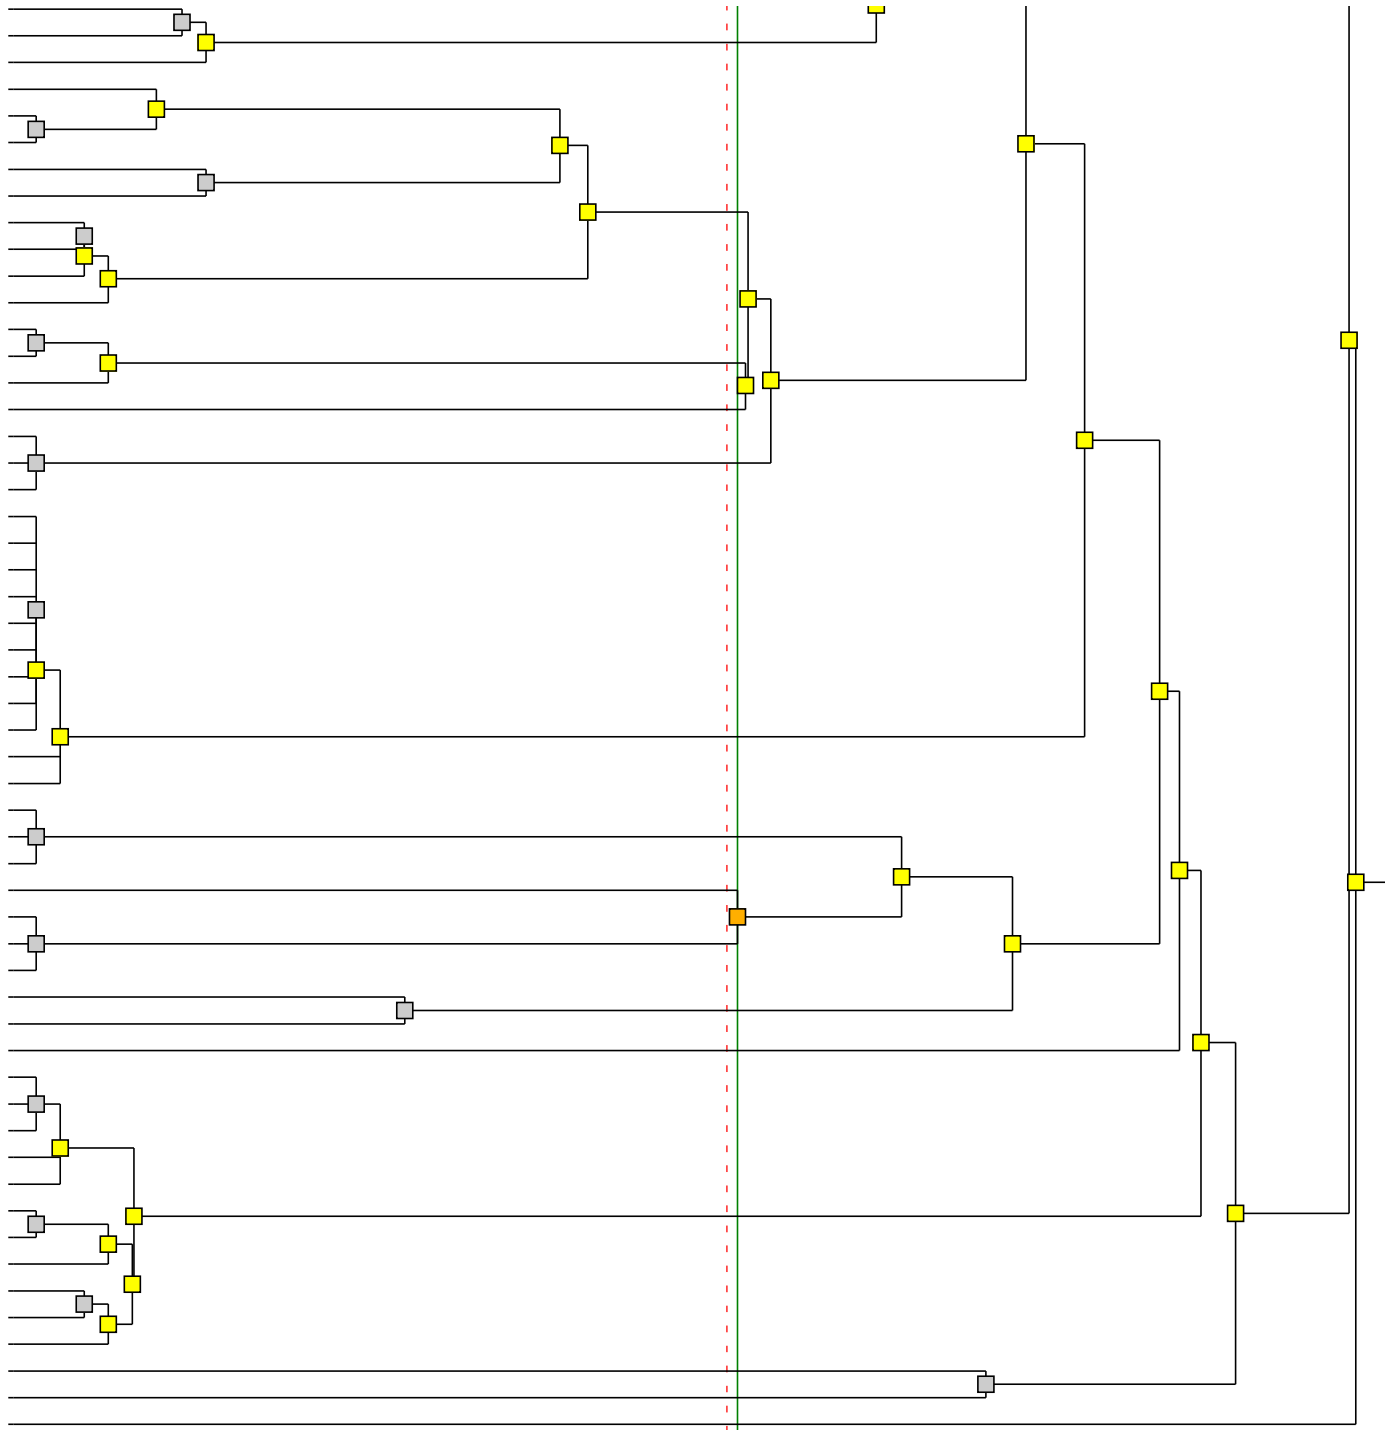

View/save curves and dendrogram [here](#)

*Responsive Crossing lines Legend: Green Line= grouping distance ( $D_c$ )- Red line = treshold distance( $D_t$ )*

Running time: 0 min 9 seconds
