# Supplementary figures and images for: DNA Barcoding Supports “Color-Pattern’’-Based Species of Stictochironomus from China (Diptera: Chironomidae)
Source: MDPI journal article supplement (doi:10.3390/insects15030179), 2024-03-06

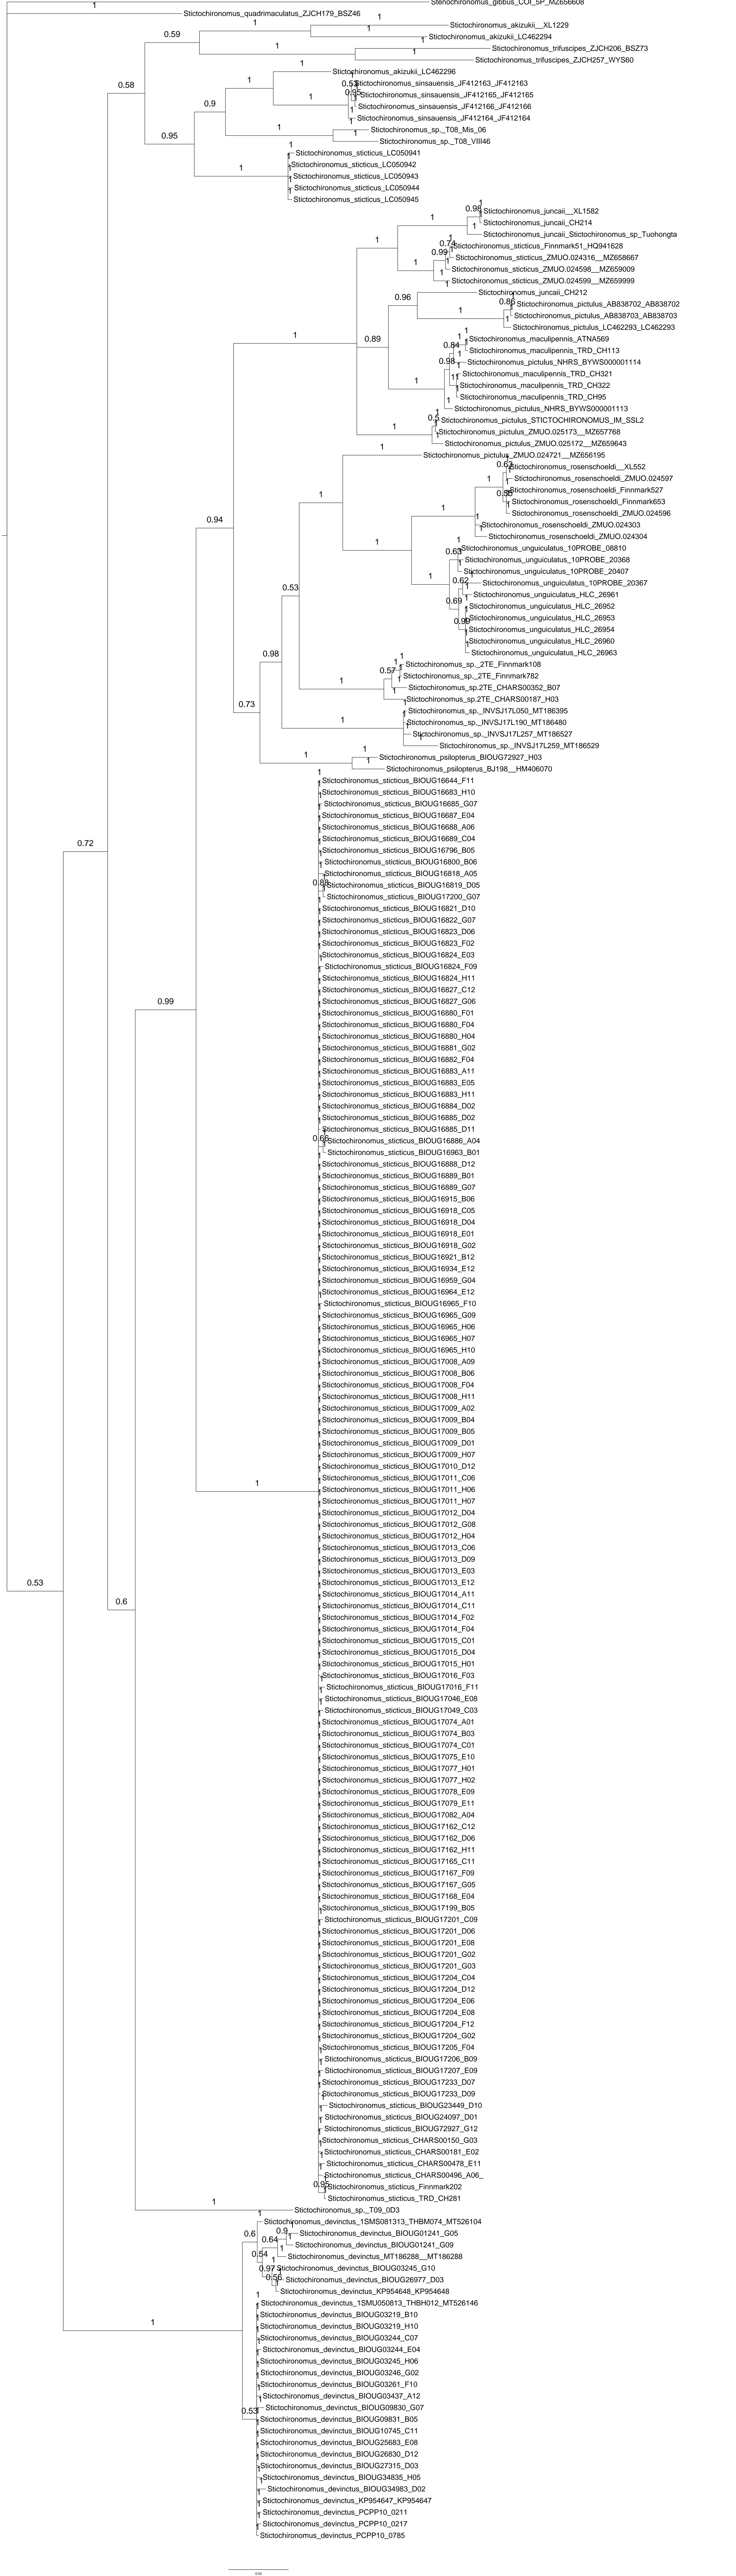

Supplement: s1 [file s1]

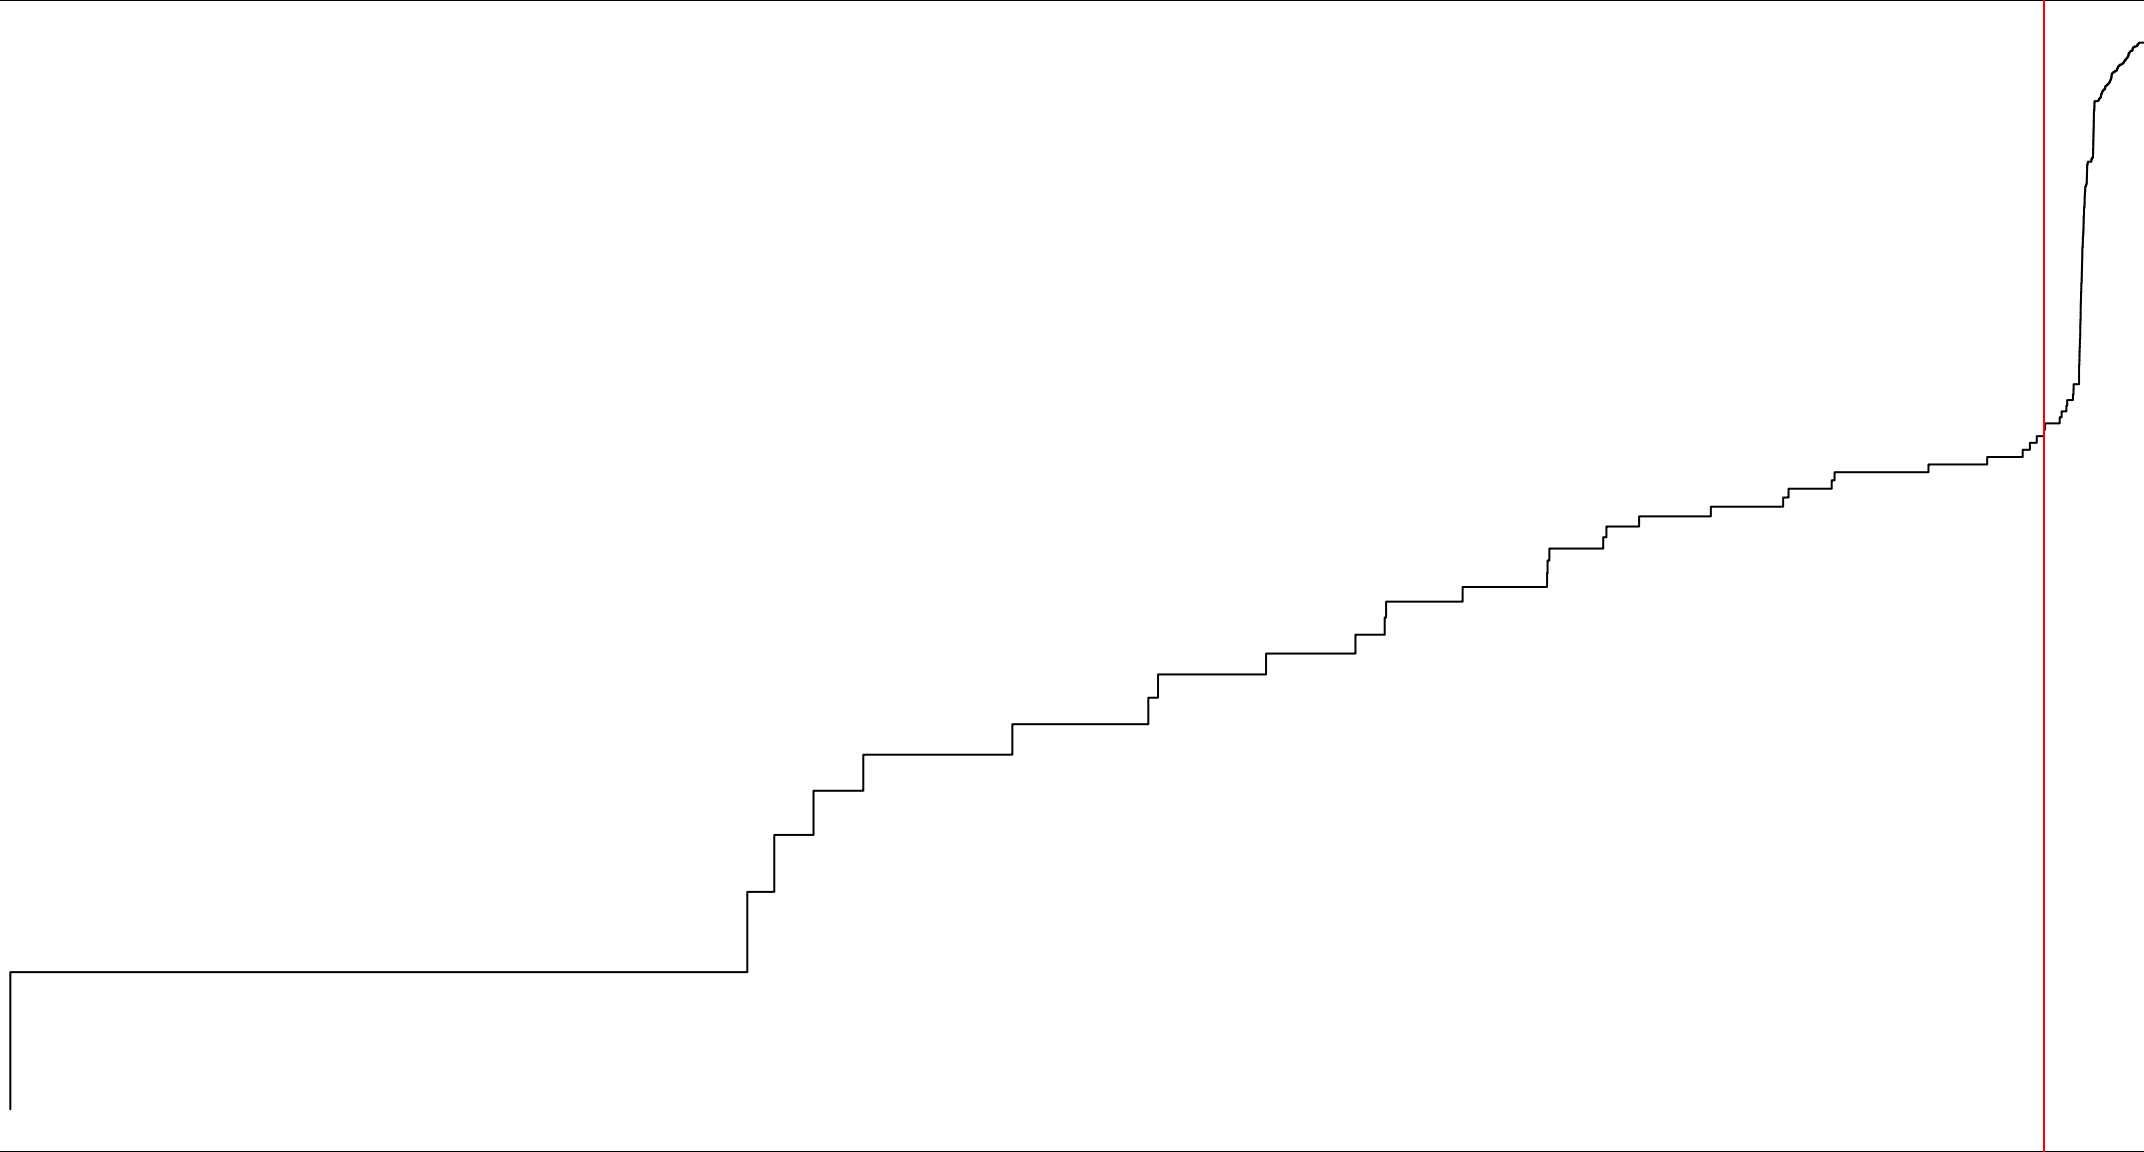

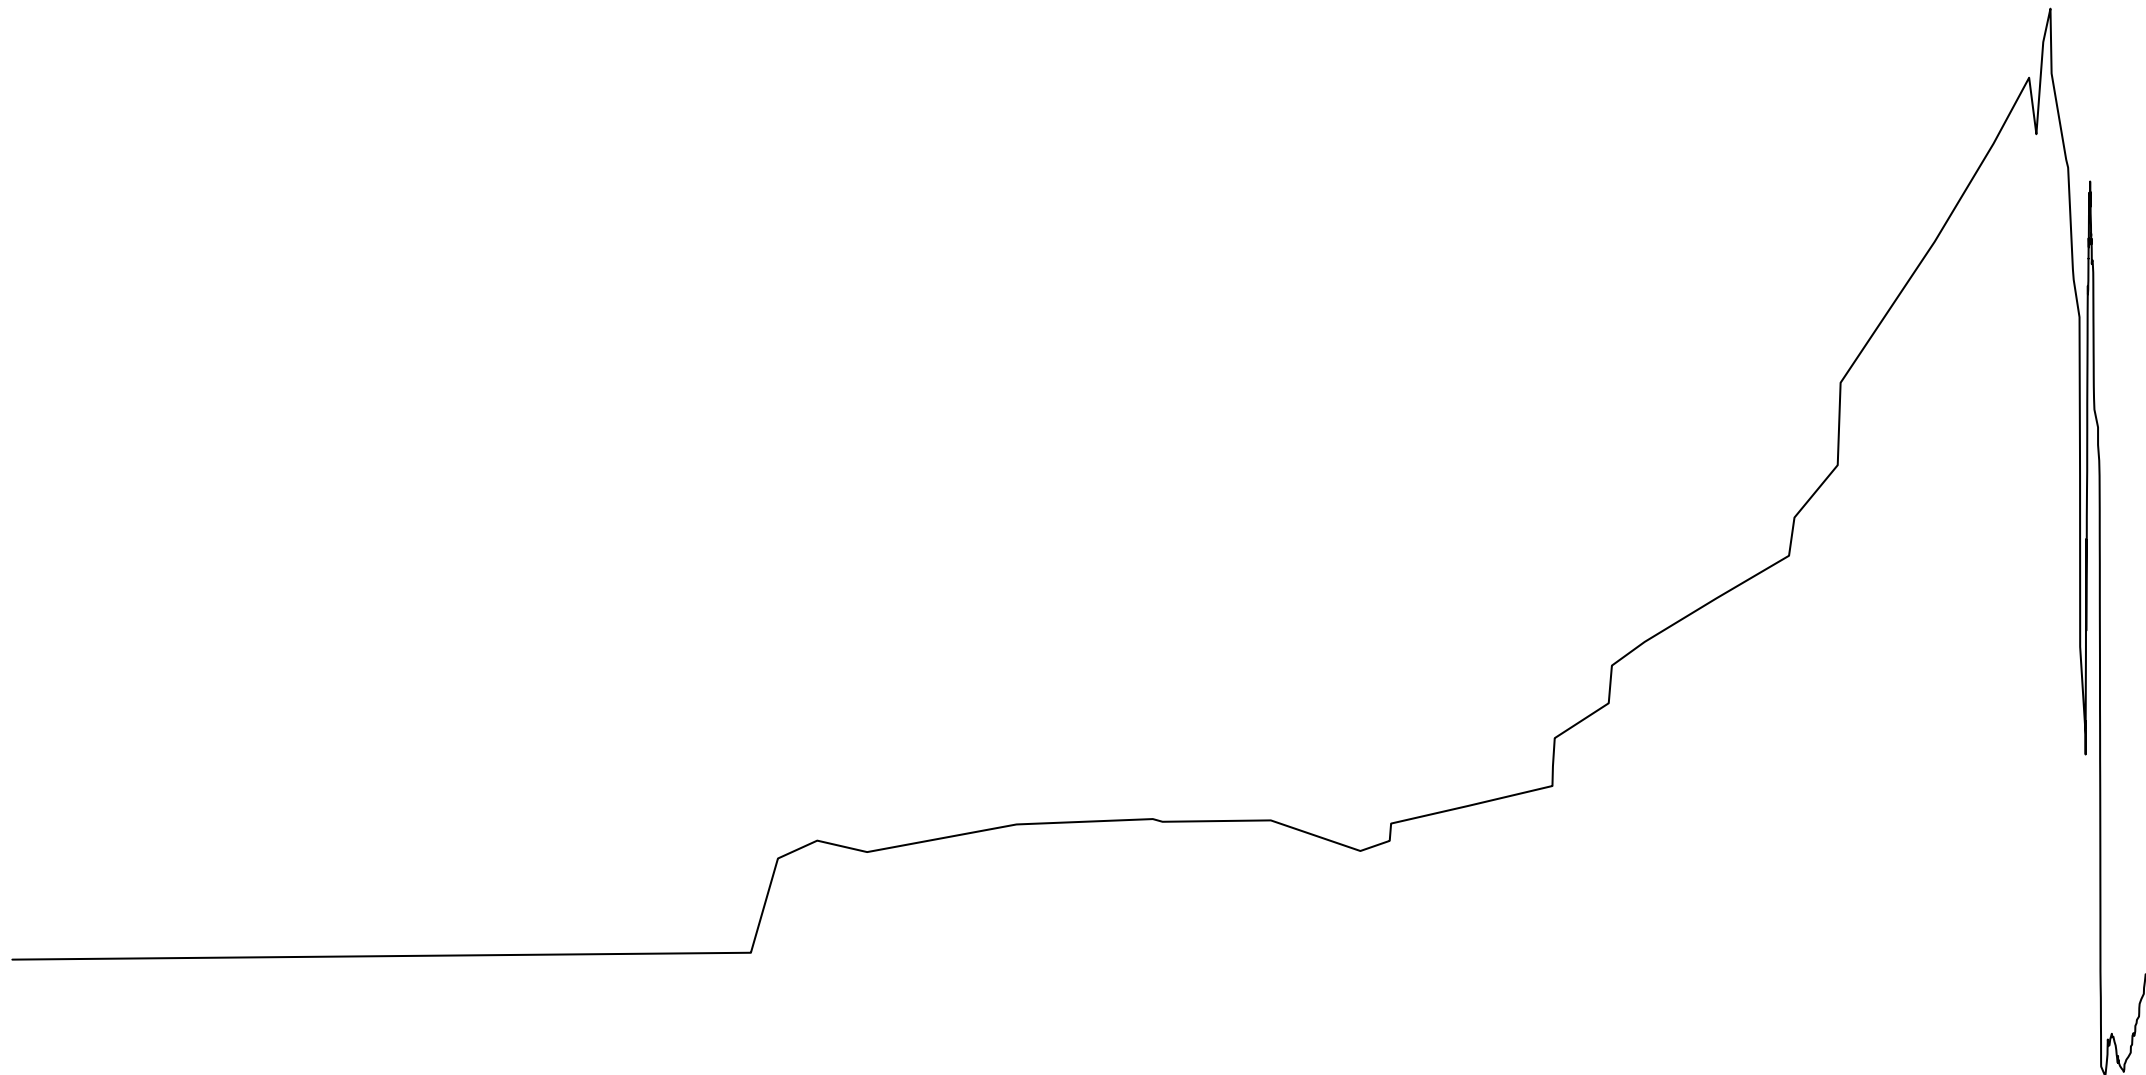

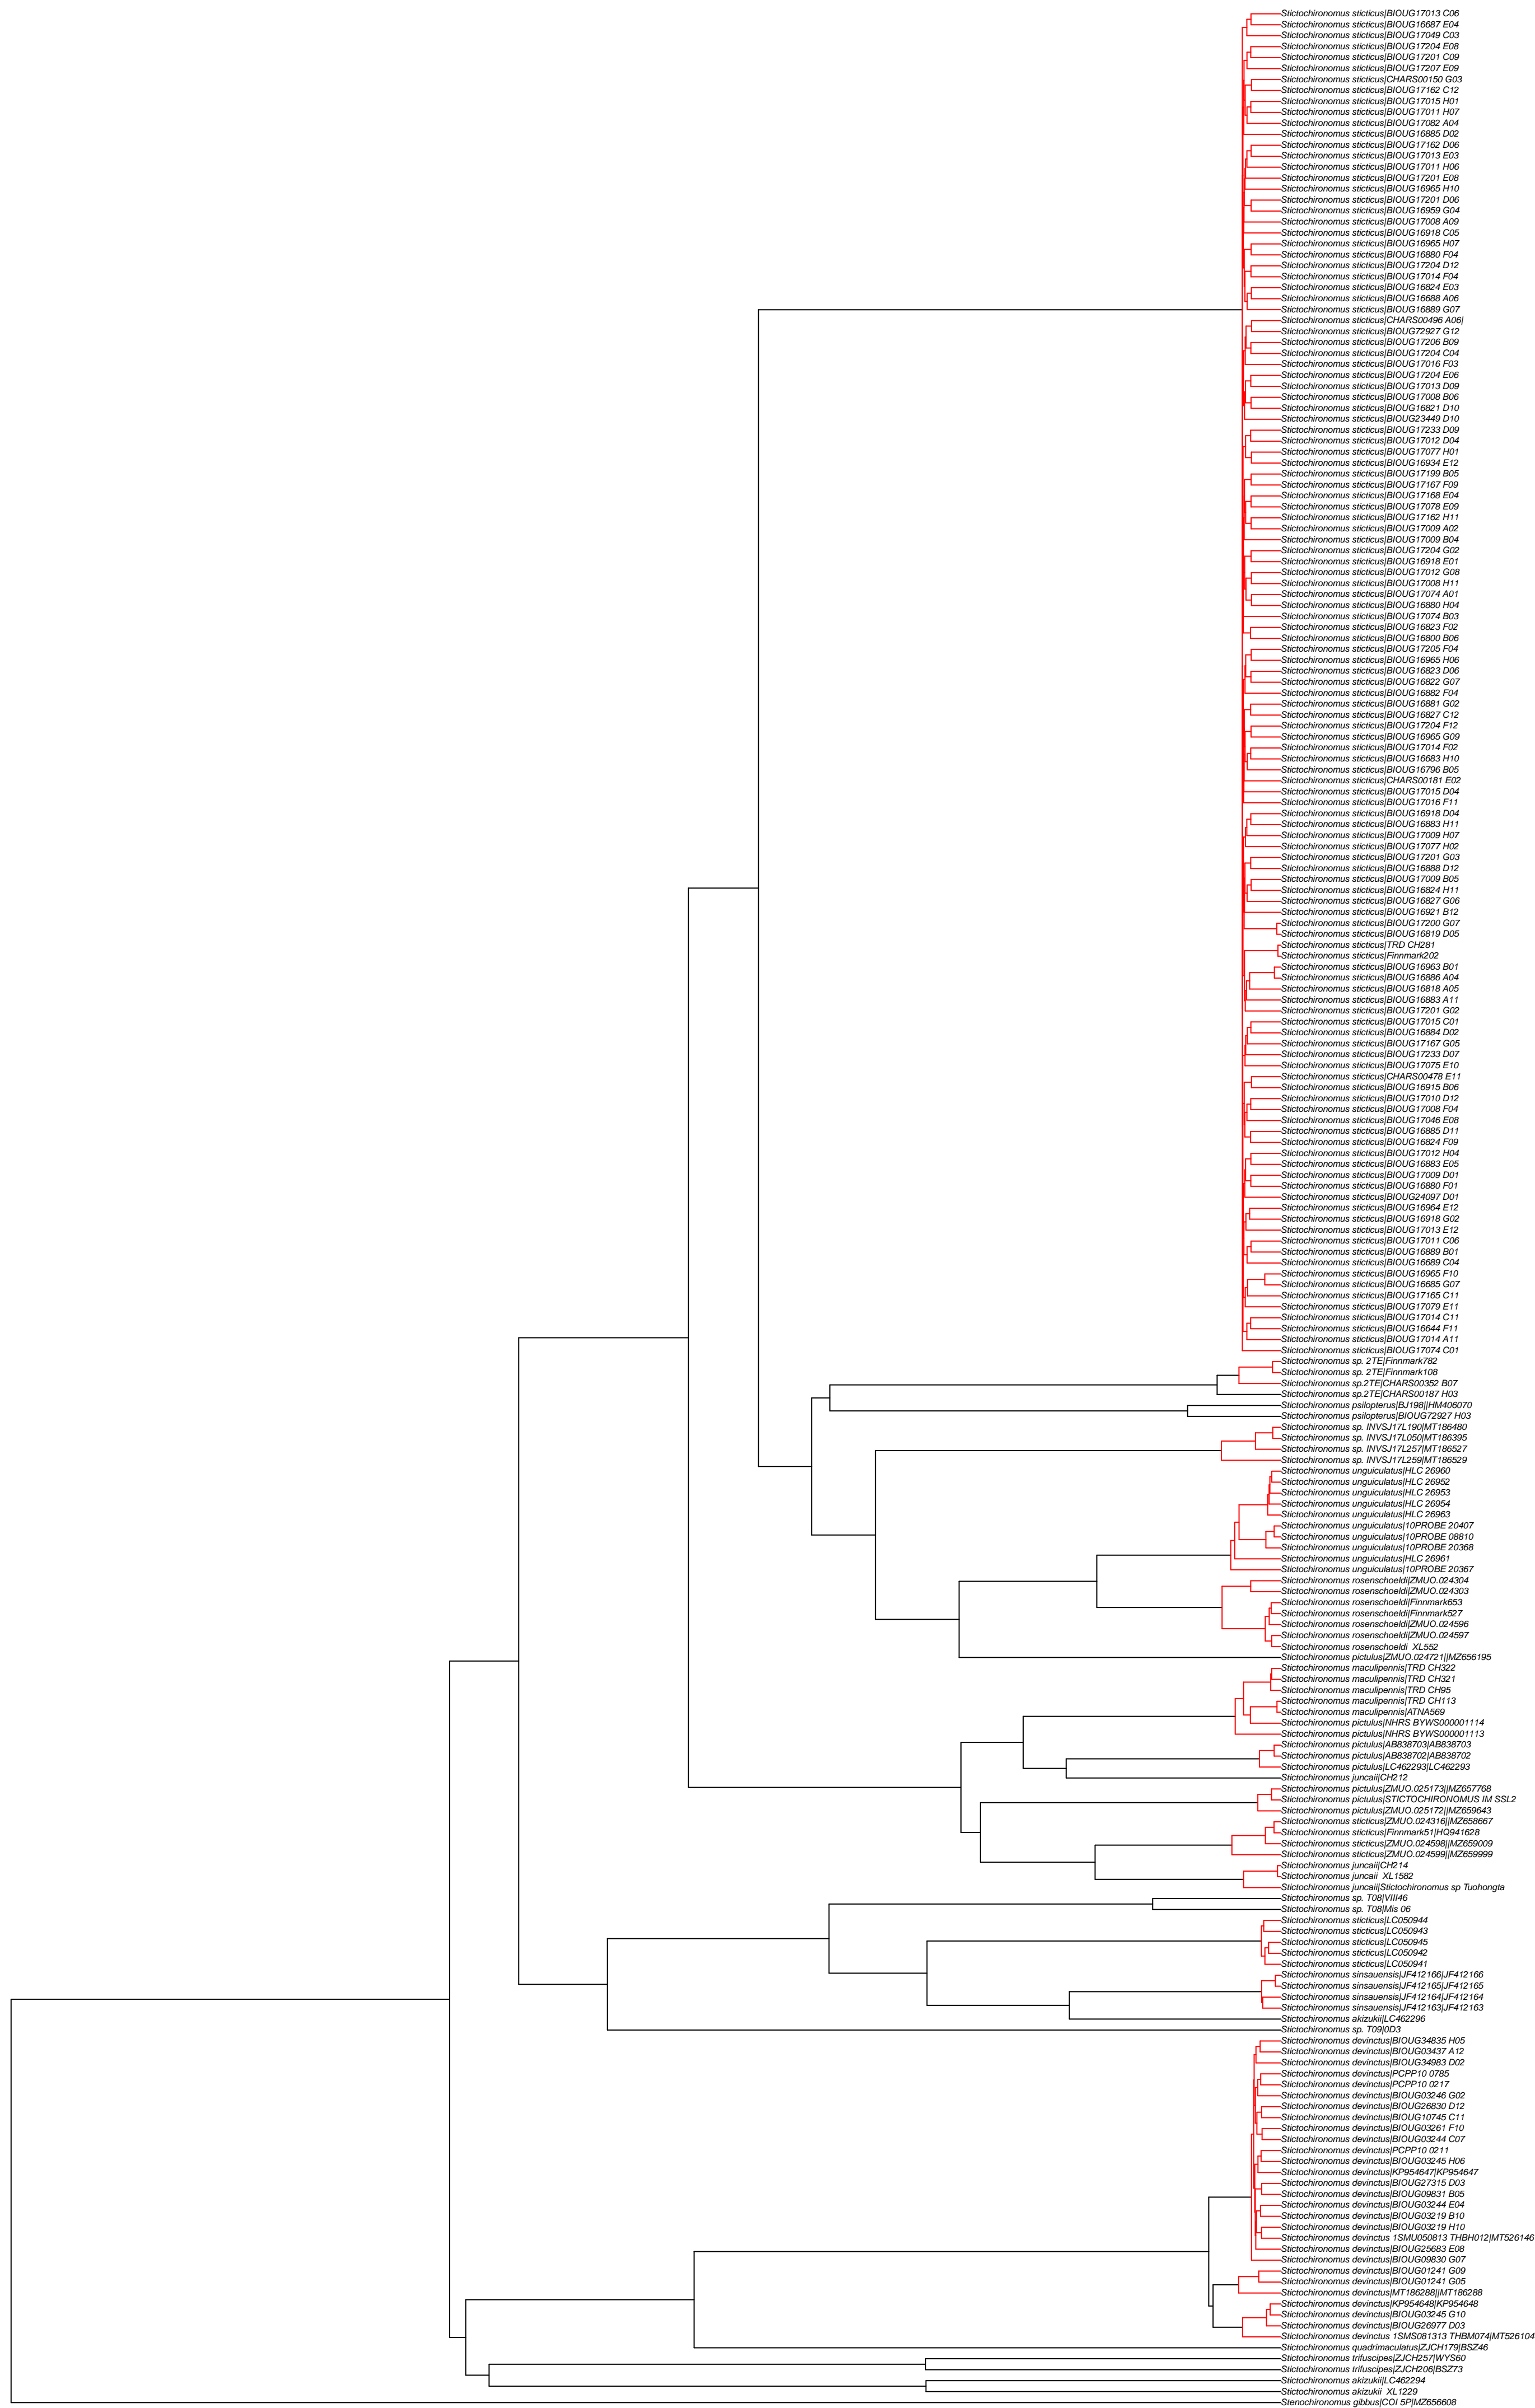



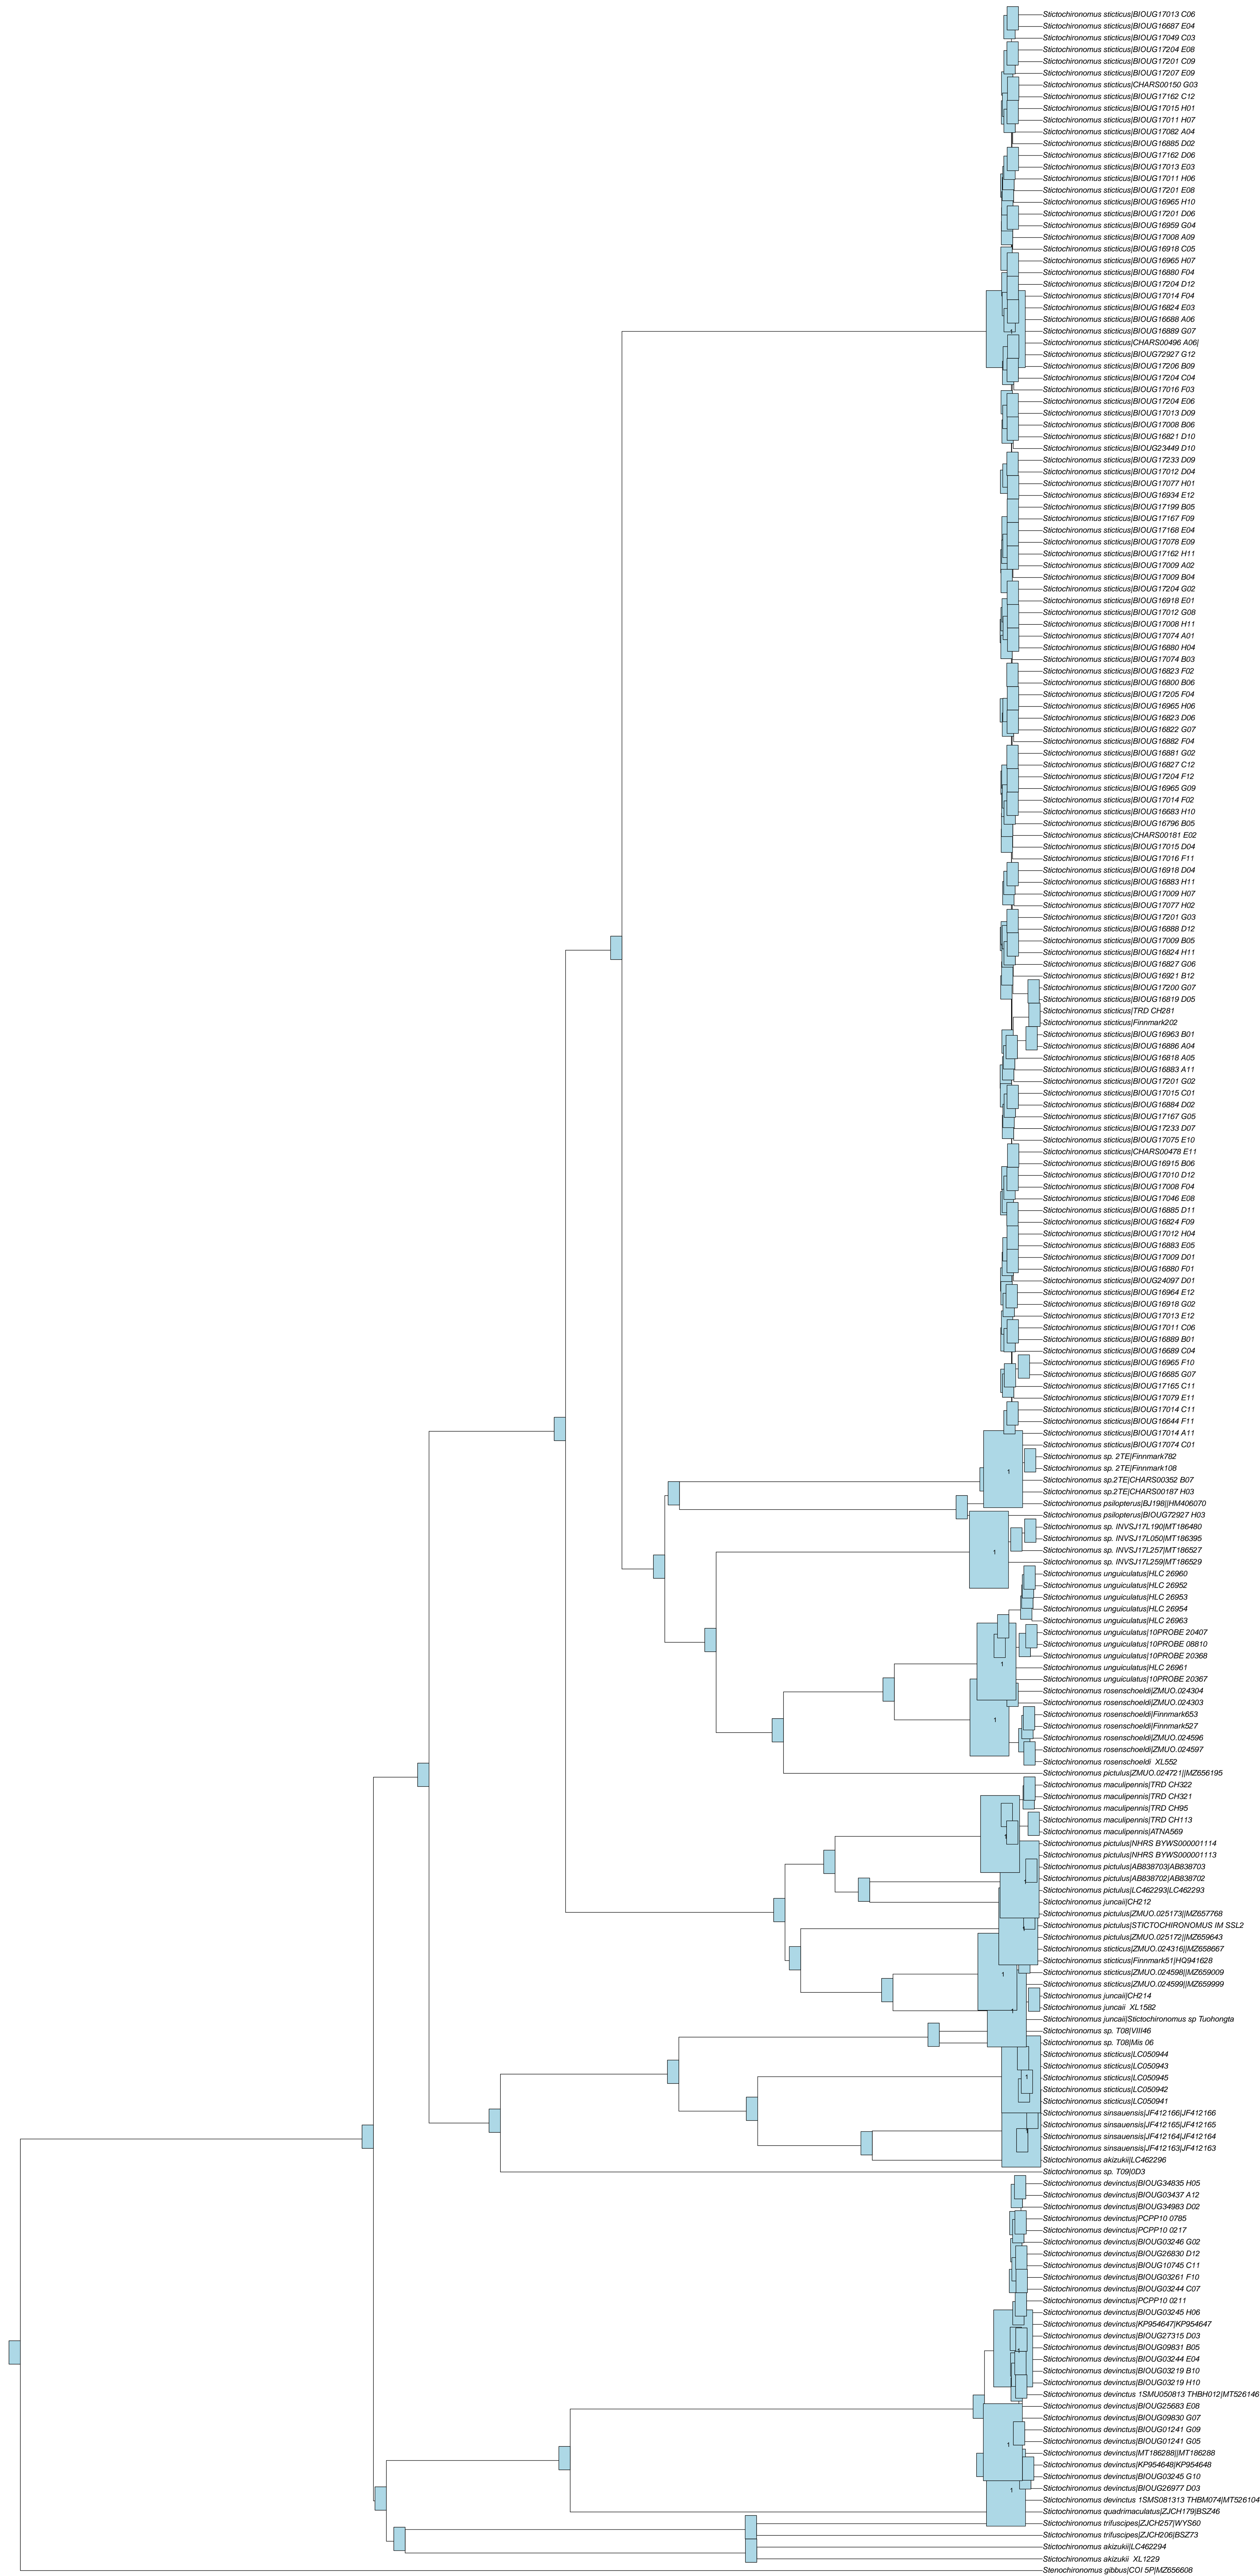

Supplement: s1 [file s1]

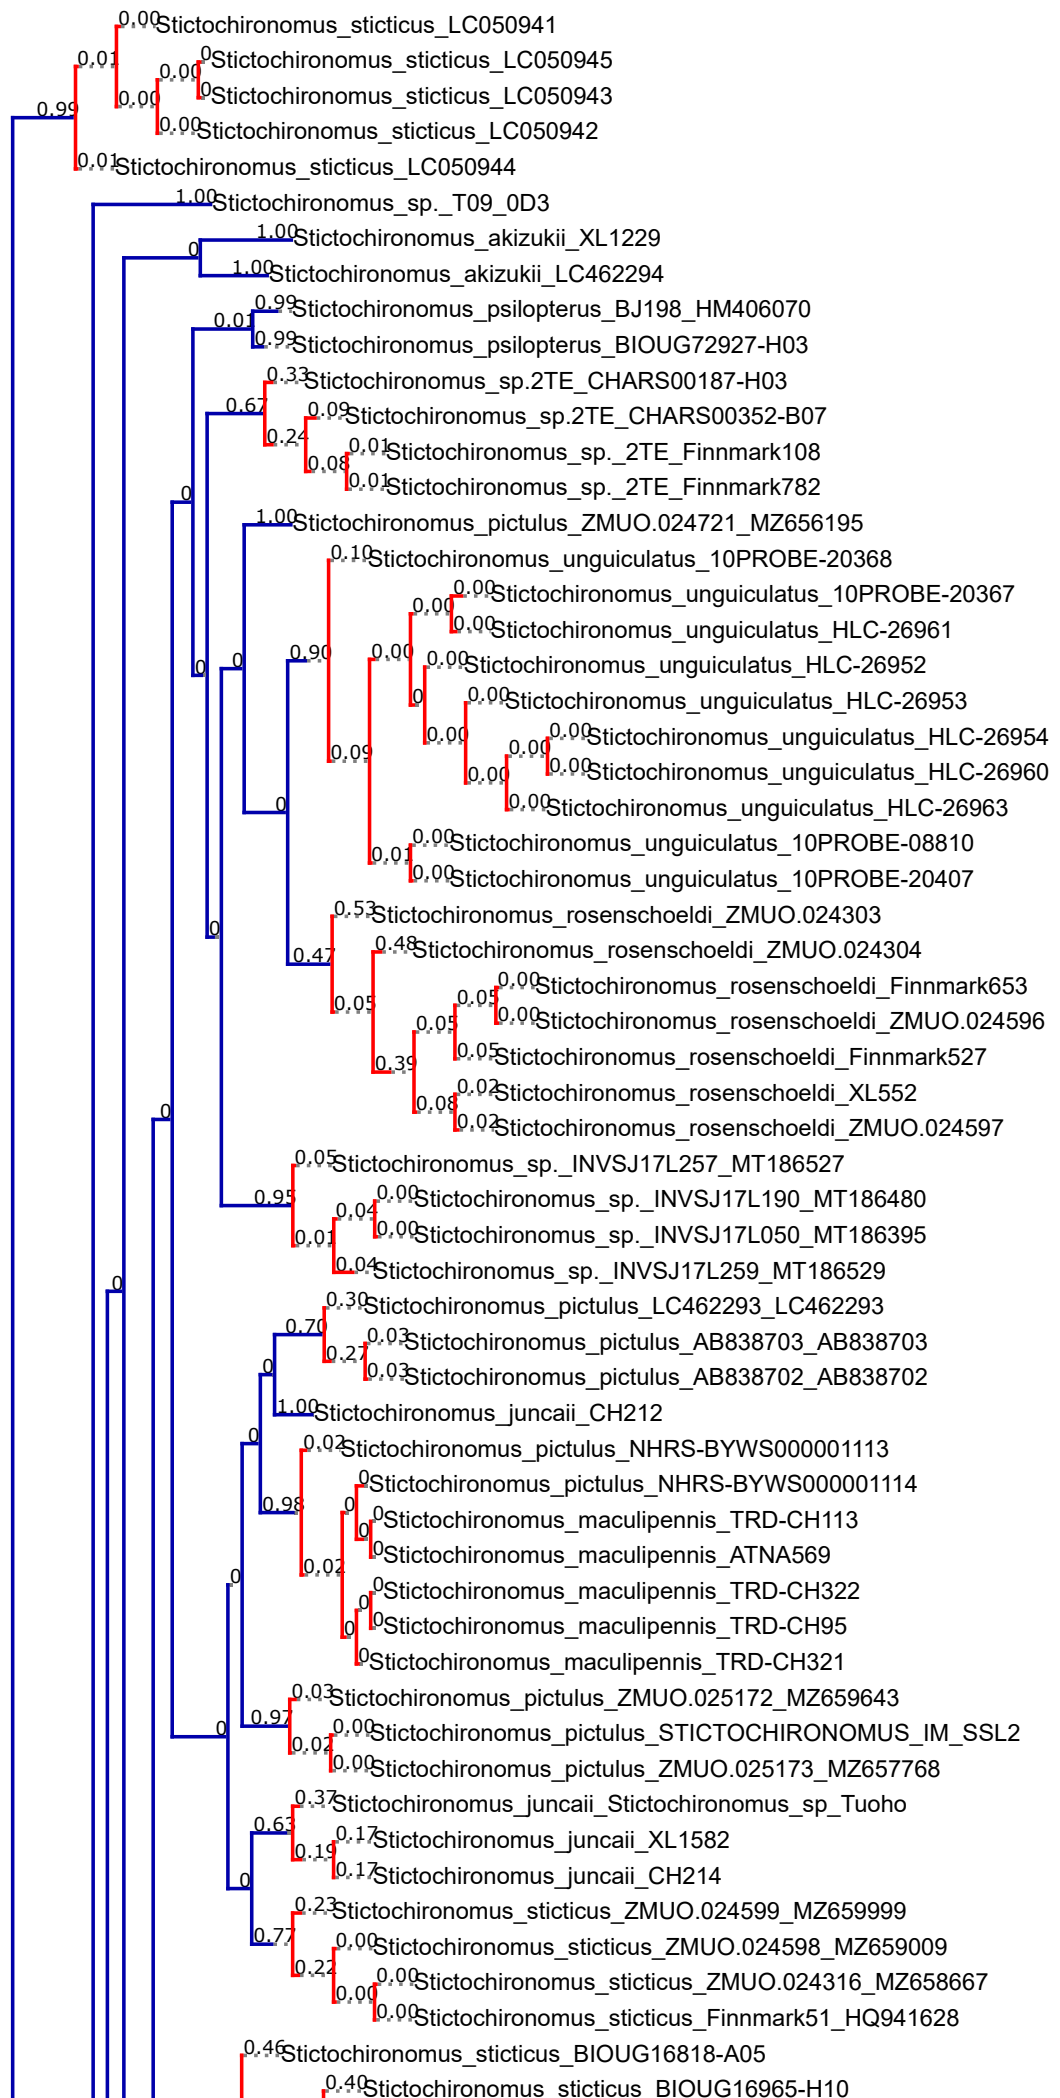

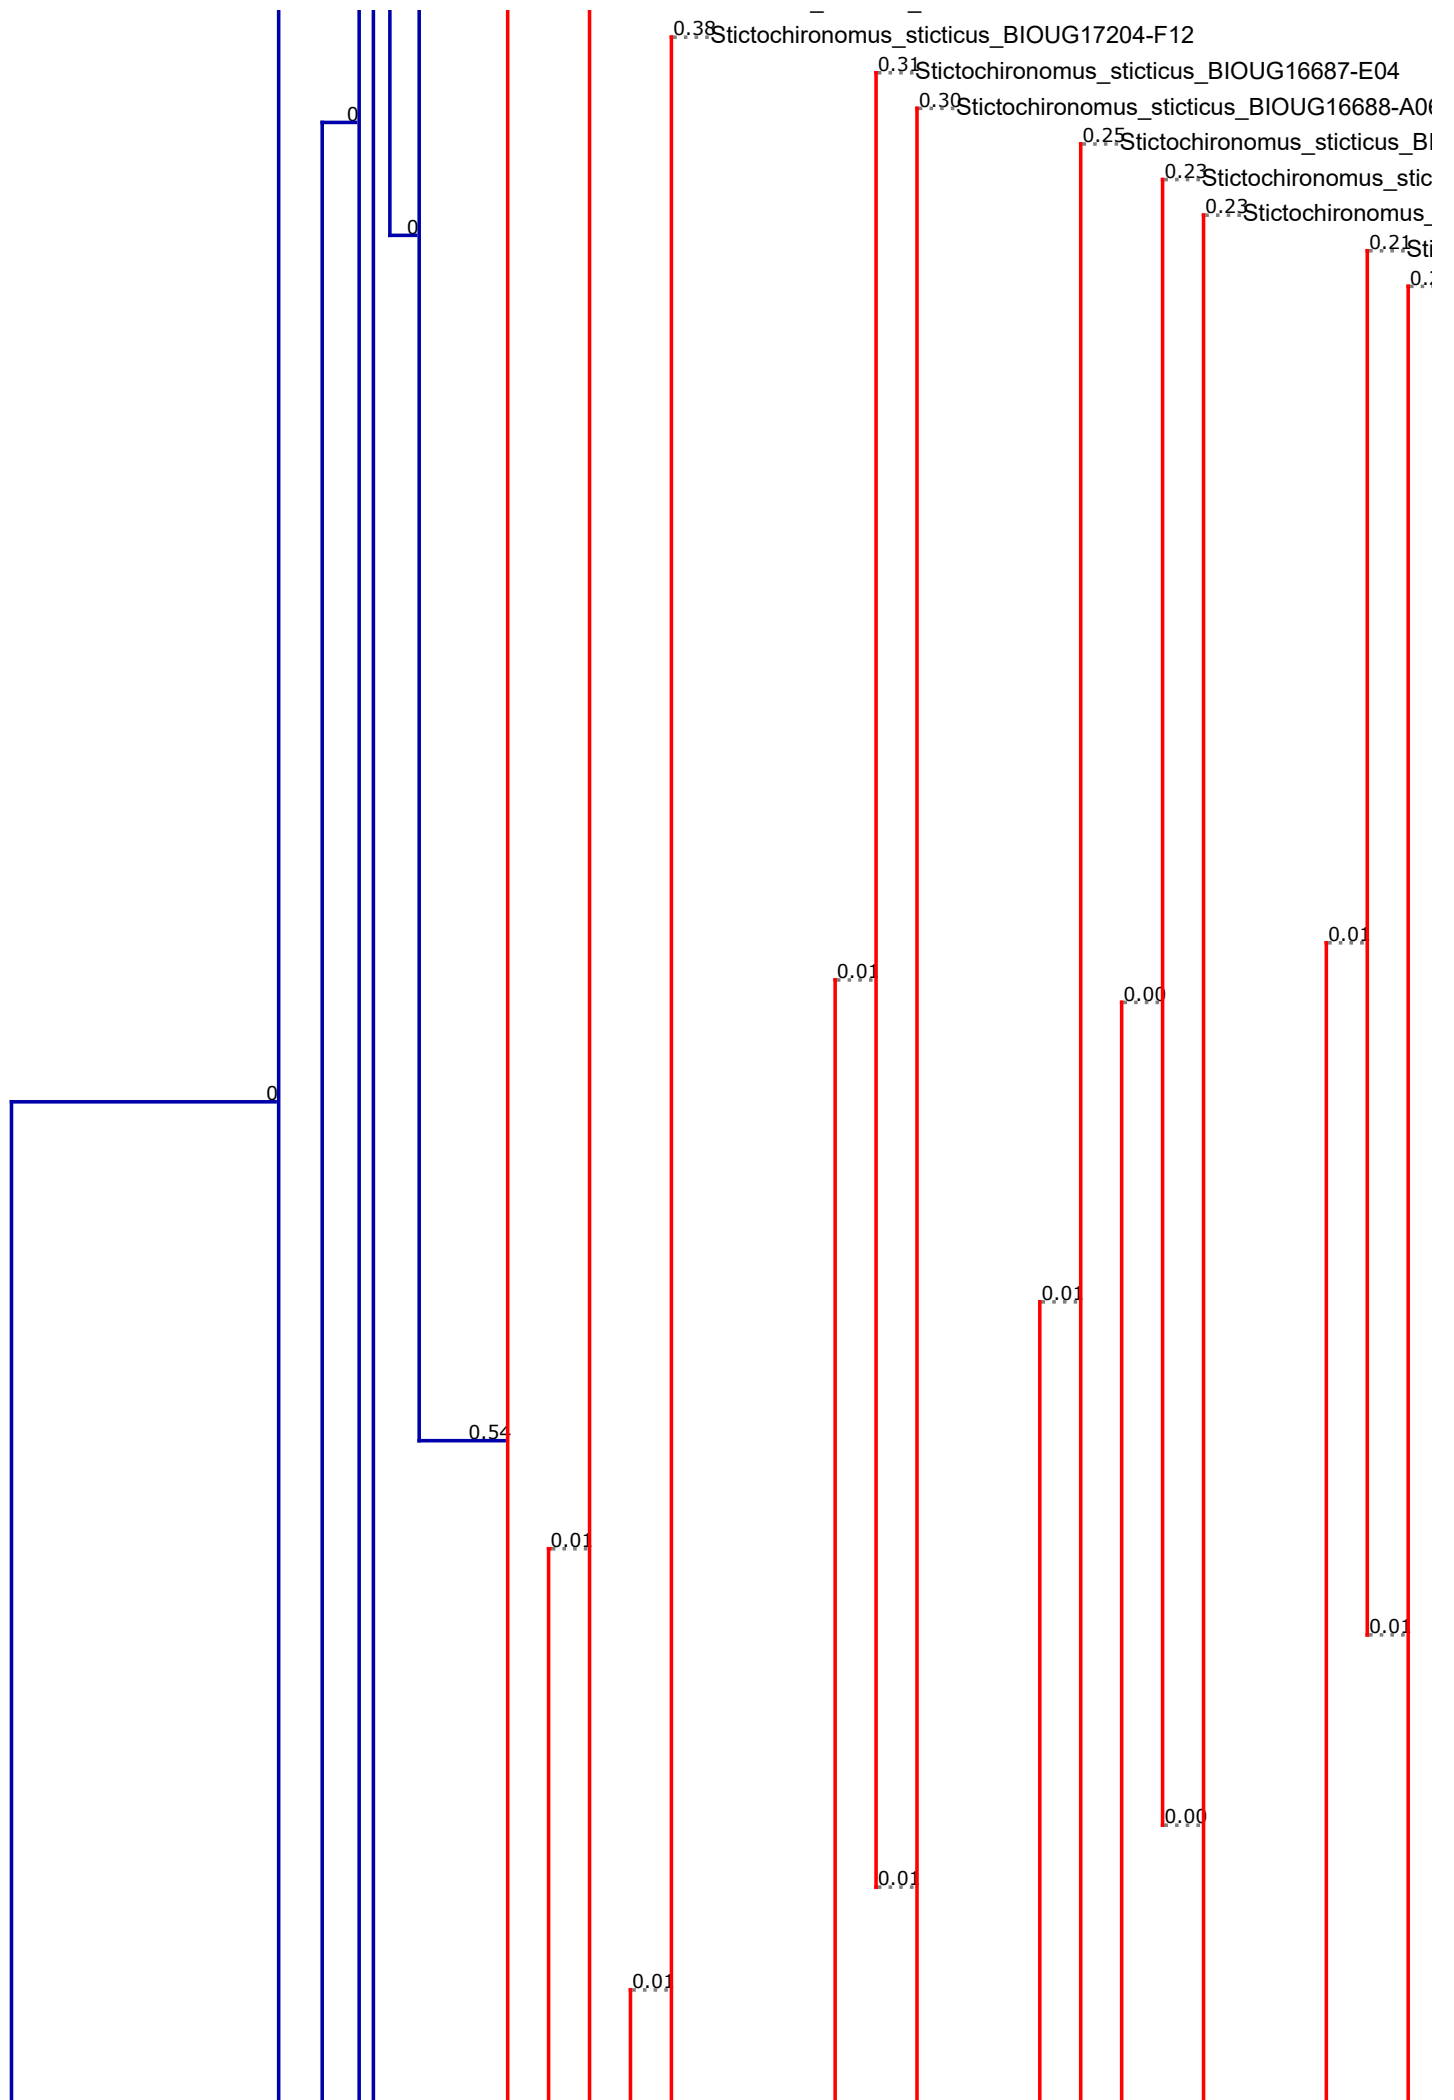

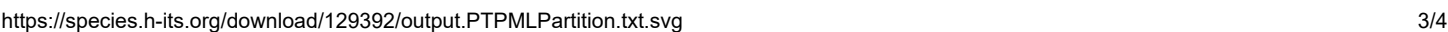

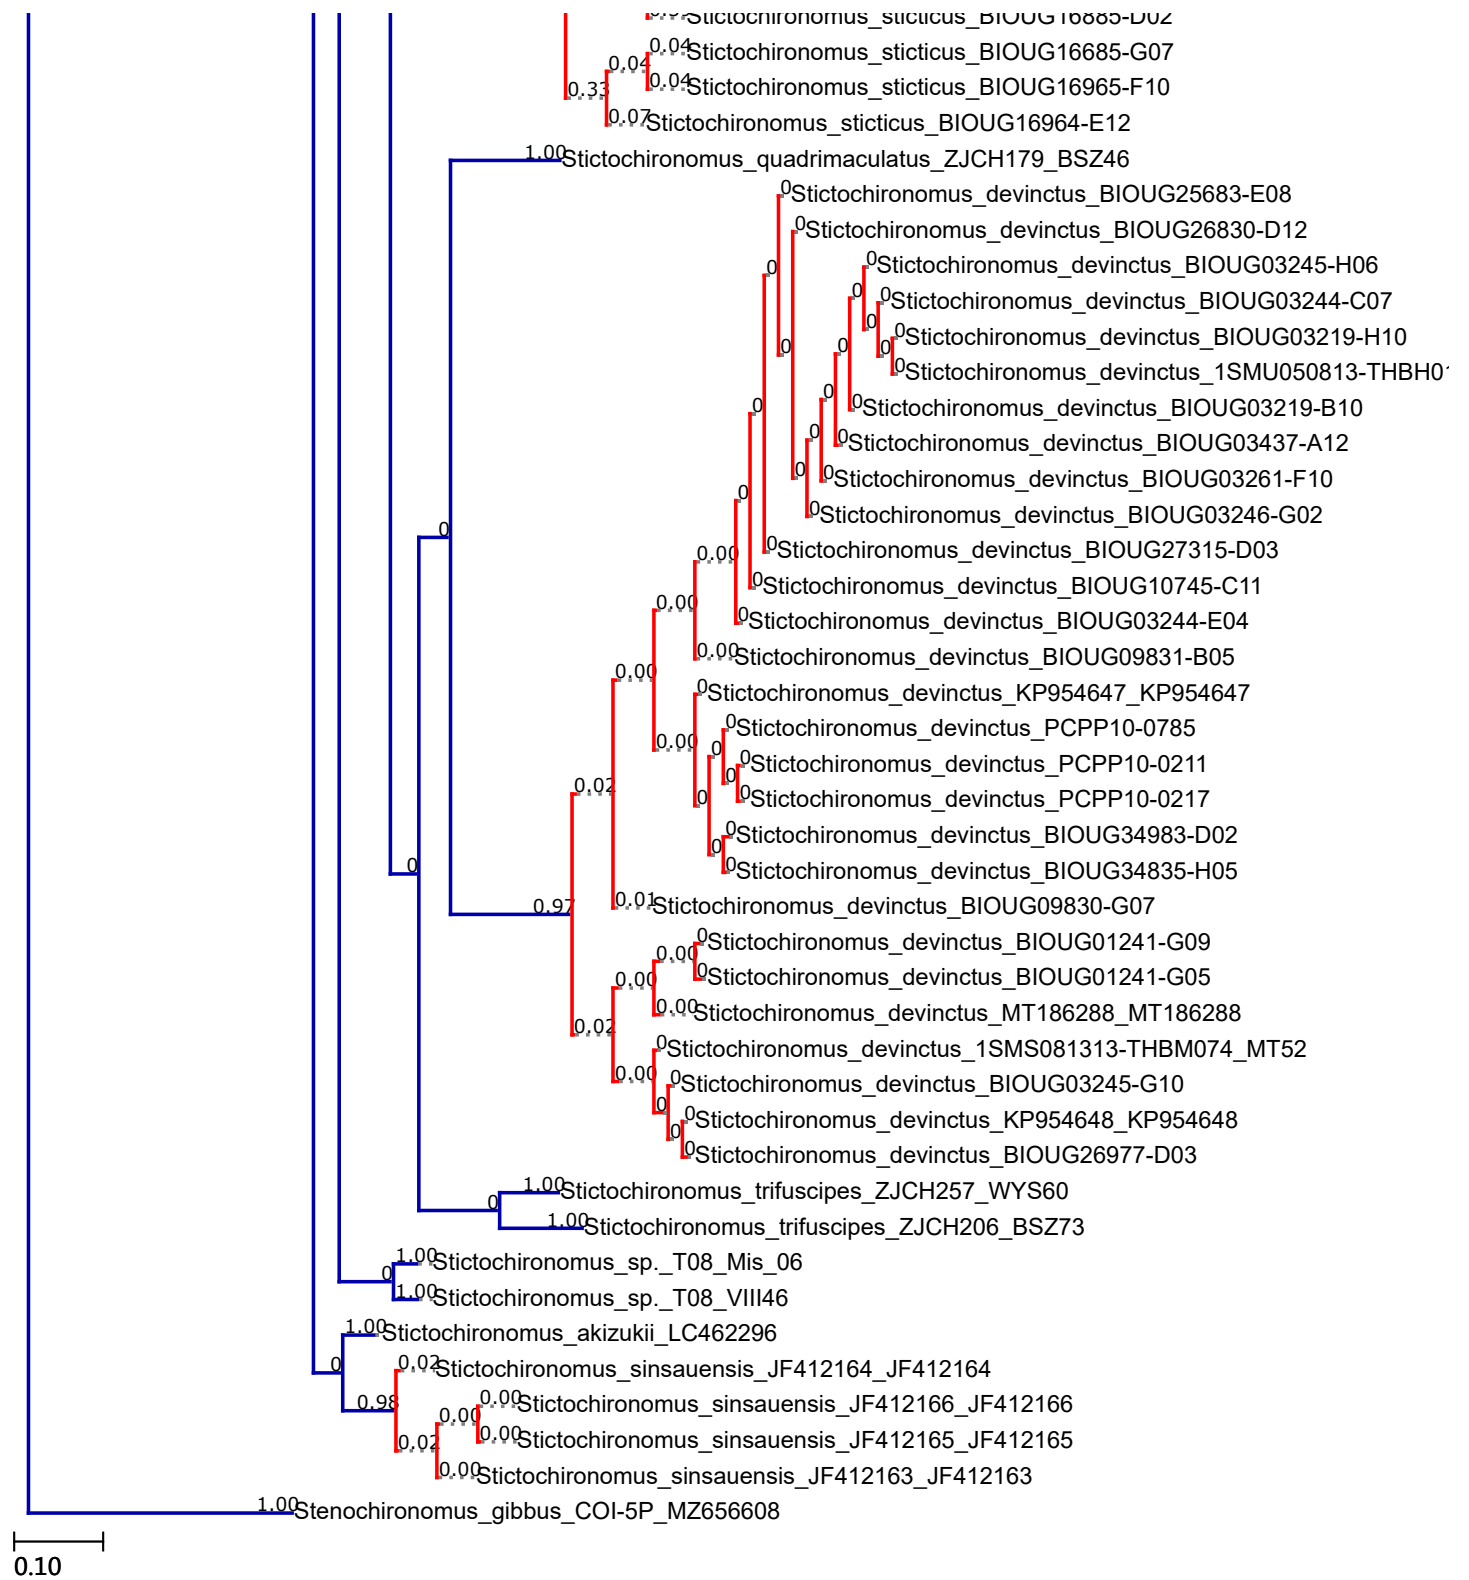

Supplement: s1 [file s1]

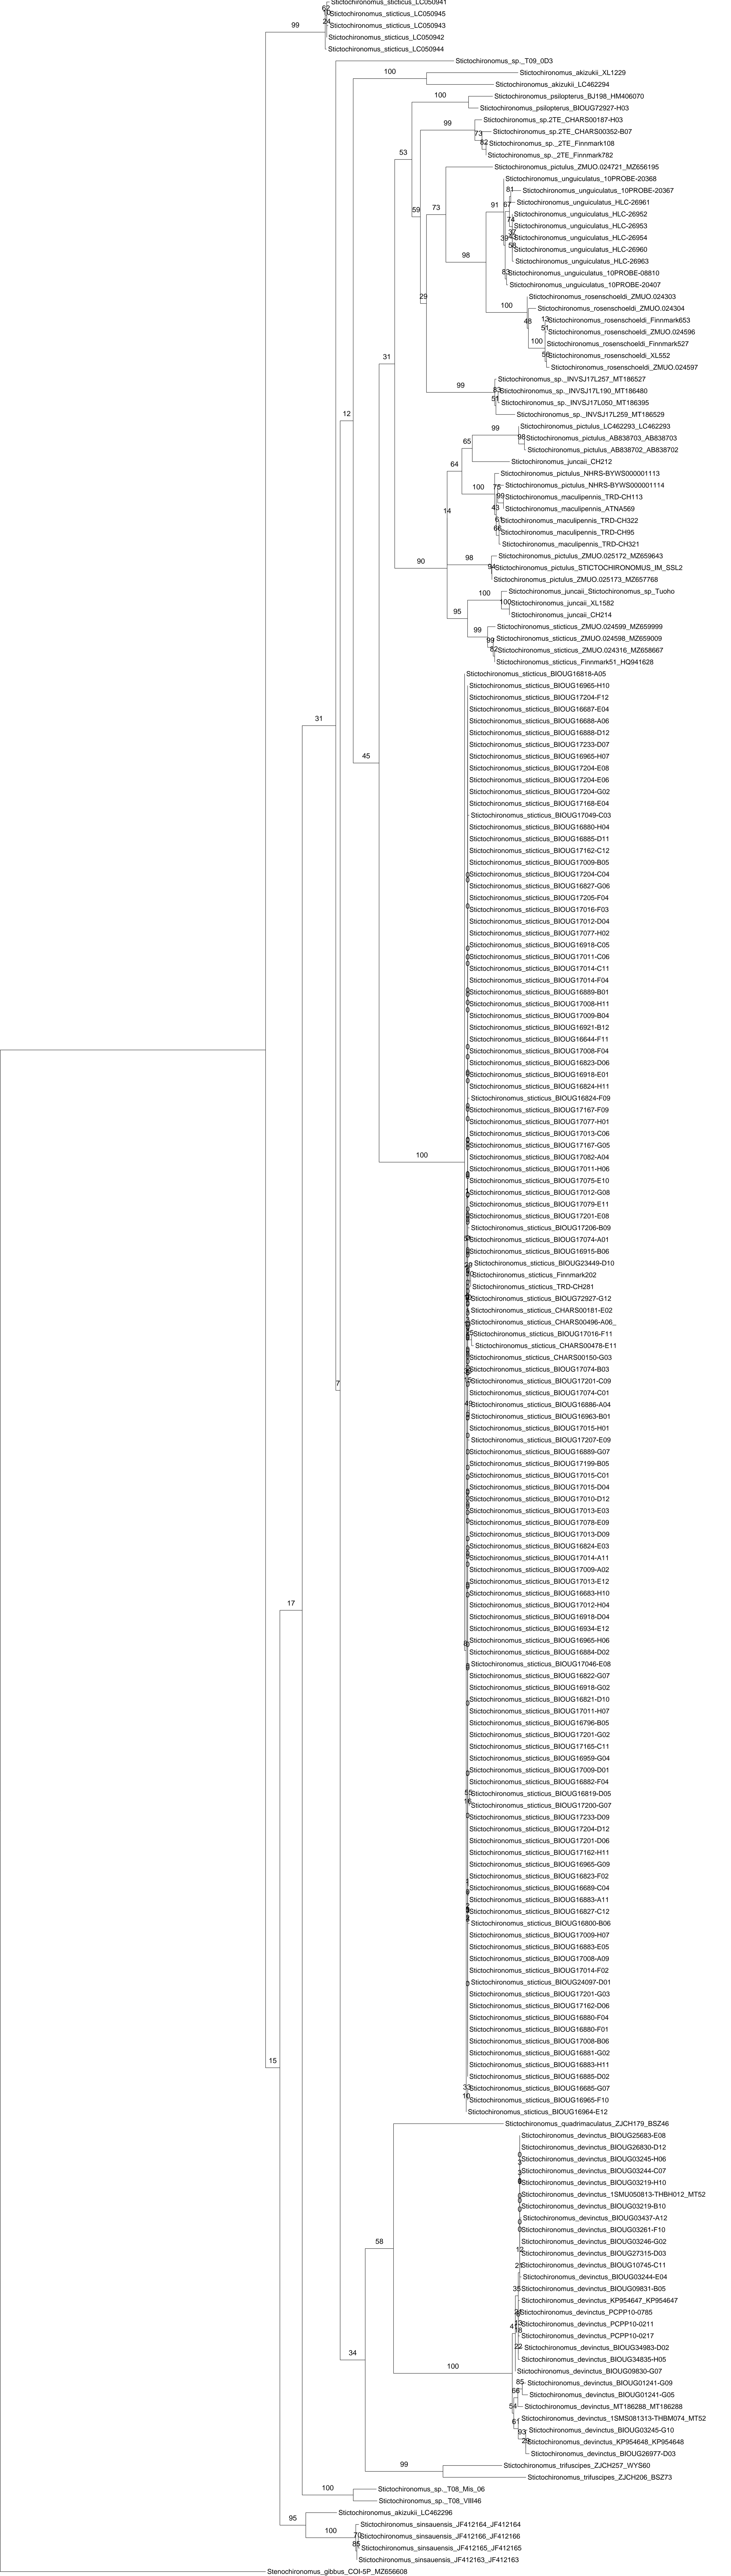

Supplement: s1 [file s1]
